# Supplementary material
Source: PubMed Central journal article supplement (PMC3735936)
Supplement: supp_M037093_jlr.M037093-1.pdf [file supp_M037093_jlr.M037093-1.pdf]

## Supplemental Files

Lipid transfer particle from silkworm, *Bombyx mori* is a novel member of the apoB/large lipid transfer protein family.

Hiroshi Yokoyama\*<sup>†</sup>, Takeru Yokoyama\*<sup>†</sup>, Masashi Yuasa\*, Hirofumi Fujimoto\*, Takashi Sakudoh\*, Naoko Honda\*, Hajime Fugo\*\* and Kozo Tsuchida\*<sup>†</sup>

<sup>†</sup>These authors contributed equally to this work.

## Supplemental Files

**Supplemental TABLE 1.** Accession numbers of sequences of the large lipid transfer protein (LLTP) superfamily.

LLTP sequences were collected from the National Center for Biotechnology Information (NCBI\* <http://www.ncbi.nlm.gov>) protein sequence database. Lipid transfer particle (LTP) from silkworm, *B. mori*, is a novel member of the apoB/large lipid transfer protein family.

**Supplemental Fig. 1.** cDNA structure of *Bombyx mori apoLTP-II/I*.

The column (*apoLTP-II* and *apoLTP-I* cDNA) indicated the ORF of apoLTP-II/I cDNA. PCR primers used for determination of the cDNA sequence are indicated above the column. All sequences from 5'-RACE, 3'-RACE, and RT-PCR methods were combined into the full-length cDNA sequence of *B. mori apoLTP-II/I*. For details on the determination of cDNA, see the Materials and Methods.

**Supplemental Fig. 2.** Alignment of conserved motifs in the large lipid transfer (LLT) module of the large lipid transfer protein (LLTP) superfamily.

Twenty-two conserved motifs, N1-N22, are indicated below the alignment. The allowed conservative substitution were as follows: A, G; S, T; E, D; R, K, H; Q, N; V, I, L, M; Y, F, W; P; and C. Gaps are indicated by dashes;  $\geq 50\%$  identical amino acid residues are boxed in gray.

**Supplemental Fig. 3.** Multiple alignment of *Bombyx mori* apoLTP-III and similar proteins collected from the NCBI protein database.

The predicted JHBP superfamily domain is indicated by a dotted line above the alignment. The allowed conservative substitutions were as follows: A, G; S, T; E, D; R, K, H; Q, N; V, I, L, M; Y, F, W; P; and C. Gaps are indicated by dashes;  $\geq 50\%$  identical amino acid residues are boxed in gray.

Supplemental Table 1. Accession numbers of amino acid sequences of LLTPs

| Sequence name               | Species                         | Protein accession number |
|-----------------------------|---------------------------------|--------------------------|
| Vtg1_Nematode               | <i>Caenorhabditis elegans</i>   | NP_509305.1              |
| Vtg5_Nematode               | <i>Caenorhabditis elegans</i>   | NP_508589.1              |
| MTP_Chicken                 | <i>Gallus gallus</i>            | NP_001103254.1           |
| MTP_Human                   | <i>Homo sapiens</i>             | P55157.1                 |
| MTP_Zebrafish               | <i>Danio rerio</i>              | NP_998135.1              |
| apoB_Chicken                | <i>Gallus gallus</i>            | NP_001038098.1           |
| apoB_Human                  | <i>Homo sapiens</i>             | AAA35549.1               |
| Vtg_Crayfish                | <i>Cherax quadricarinatus</i>   | AAG17936.1               |
| Vtg_Shrimp                  | <i>Metapenaeus ensis</i>        | AAM48287.1               |
| apoB_Zebrafish              | <i>Danio rerio</i>              | XP_694827.4              |
| Vtg6c_Nematode              | <i>Caenorhabditis elegans</i>   | NP_001023276.1           |
| MTP_Fruitfly                | <i>Drosophila melanogaster</i>  | NP_610075.2              |
| CG15828_Fruitfly            | <i>Drosophila melanogaster</i>  | CG15828                  |
| LTP_Silkmoth                | <i>Bombyx mori</i>              | AB700597 *               |
| similar_to_CG15828_Honeybee | <i>Apis mellifera</i>           | XP_394269.4              |
| apoLp_Fruitfly              | <i>Drosophila melanogaster</i>  | AAC47284.1               |
| apoLp_HornWorm              | <i>Manduca sexta</i>            | Q25490.1                 |
| apoLp_Locust                | <i>Locusta migratoria</i>       | Q9U943.2                 |
| apoLp_Silkmoth              | <i>Bombyx mori</i>              | BAK82317.1               |
| M-177_Mite                  | <i>Euroglyphus maynei</i>       | AAF14270.1               |
| Vtg1_Zebrafish              | <i>Danio rerio</i>              | NP_001038362.2           |
| Vtg2_Chicken                | <i>Gallus gallus</i>            | AAA49139.1               |
| Vtg_Lamprey                 | <i>Ichthyomyzon unicuspis</i>   | Q91062.1                 |
| Vtg_GalaxyCoral             | <i>Galaxea fascicularis</i>     | BAD74020.2               |
| Vtg_PacificOyster           | <i>Crassostrea gigas</i>        | BAC22716.1               |
| Vtg1_Cockroach              | <i>Periplaneta americana</i>    | Q9U8M0.1                 |
| Vtg_Beetle                  | <i>Tenebrio molitor</i>         | AAU20328.2               |
| Vtg_SilkMoth                | <i>Bombyx mori</i>              | NP_001037309.1           |
| Vtg_WaterFlea               | <i>Daphnia magna</i>            | BAD05137.1               |
| CP_SignalCrayfish           | <i>Pacifastacus leniusculus</i> | AAD16454.1               |
| CP_TigerShrimp              | <i>Penaeus monodon</i>          | Q9U572.1                 |
| MEP_Fruitfly                | <i>Drosophila melanogaster</i>  | NP_732076.1              |
| MEP_Beetle                  | <i>Tenebrio molitor</i>         | BAB03250.1               |
| MTP_Nematoda                | <i>Caenorhabditis elegans</i>   | NP_499903.3              |

\* deduced amino acid sequence of apoLTP-II/I determined in this study

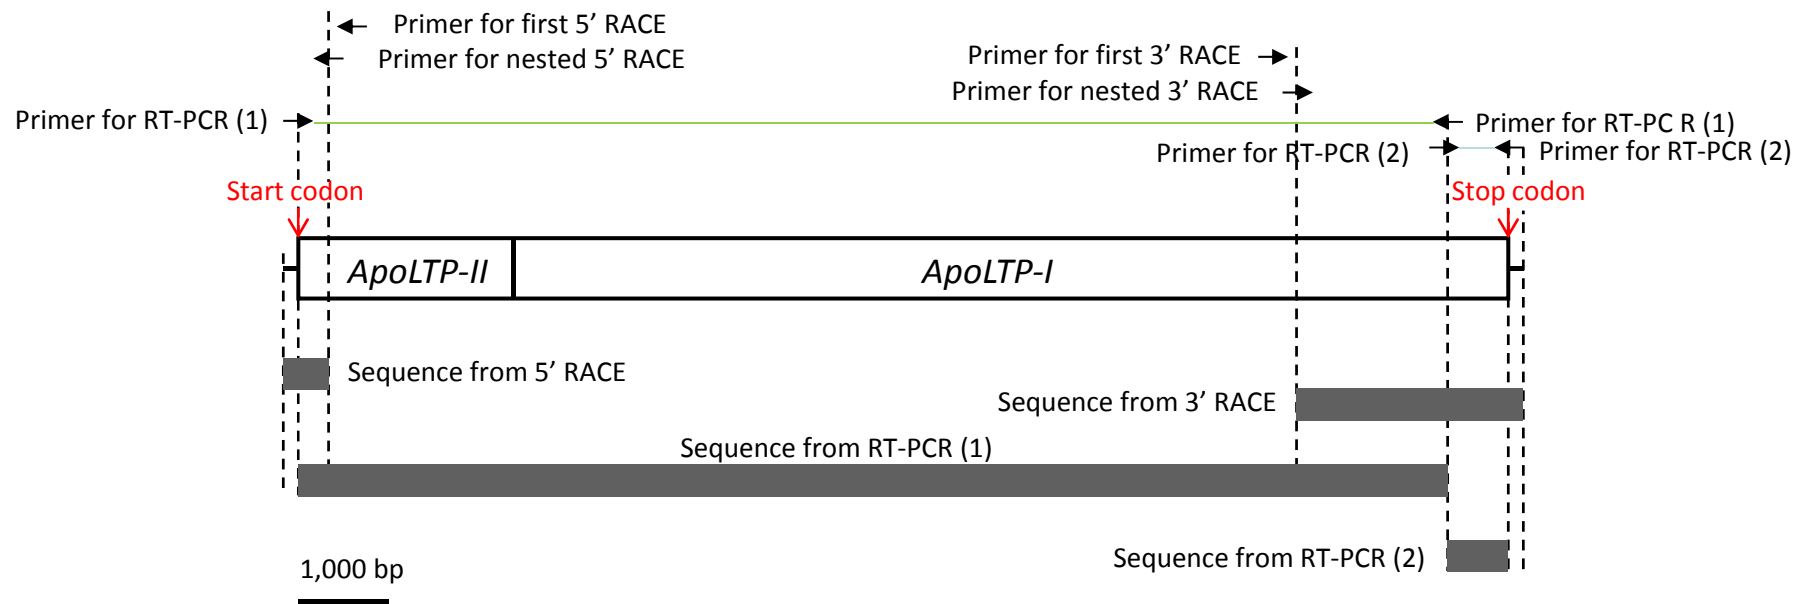

Supplemental Fig. 1

### Supplemental Fig. 2

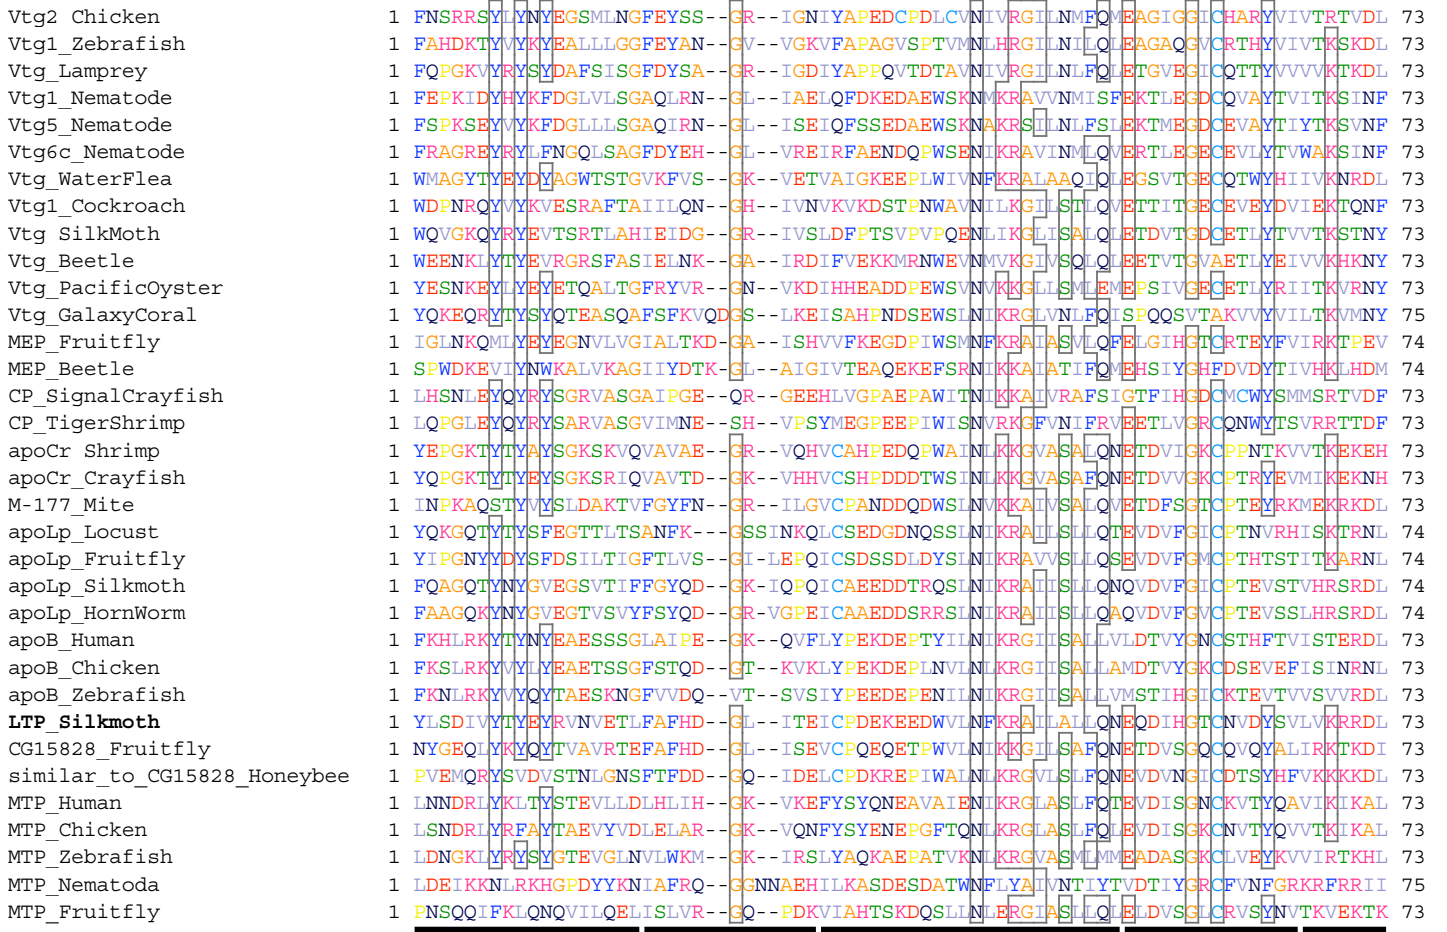

**N1                      N2                      N3                      N4                      N5**

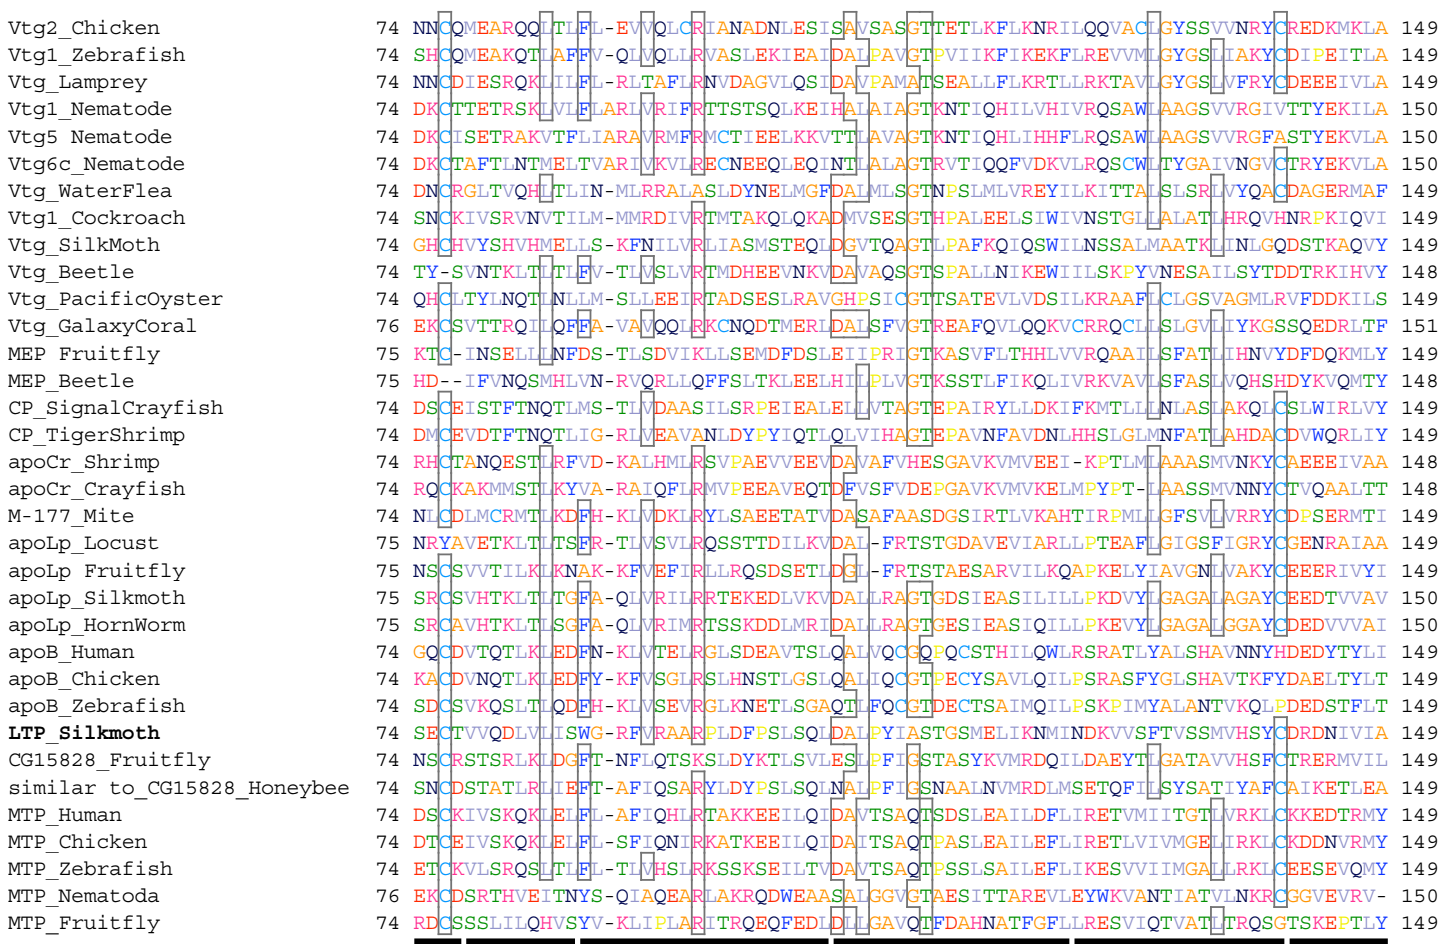

**N5                      N6                      N7                      N8                      N9                      N10**

|                             |     |      |                     |           |       |                |          |                   |                         |             |           |             |             |         |          |       |        |     |     |     |   |    |    |     |   |   |   |   |   |   |   |   |    |    |    |   |   |   |   |   |   |   |   |   |   |   |   |   |   |   |   |   |   |   |   |   |   |   |   |   |     |   |   |   |   |   |   |   |   |   |   |     |     |     |     |     |     |     |
|-----------------------------|-----|------|---------------------|-----------|-------|----------------|----------|-------------------|-------------------------|-------------|-----------|-------------|-------------|---------|----------|-------|--------|-----|-----|-----|---|----|----|-----|---|---|---|---|---|---|---|---|----|----|----|---|---|---|---|---|---|---|---|---|---|---|---|---|---|---|---|---|---|---|---|---|---|---|---|---|-----|---|---|---|---|---|---|---|---|---|---|-----|-----|-----|-----|-----|-----|-----|
| Vtg2_Chicken                | 150 | LKCI | GNMGEPASLKRILKFLIQD | AI        | ITL   | LKKIAWKDVQGY   | L        | IQ                | LL-ADQSLPPEVRMMACAVIFET | PALALITTT   | I         | AN          | 225         |         |          |       |        |     |     |     |   |    |    |     |   |   |   |   |   |   |   |   |    |    |    |   |   |   |   |   |   |   |   |   |   |   |   |   |   |   |   |   |   |   |   |   |   |   |   |   |     |   |   |   |   |   |   |   |   |   |   |     |     |     |     |     |     |     |
| Vtg1_Zebrafish              | 150 | LKVM | GNAGHPSSLKPI        | MKLLVQVDA | I     | LALRNIAKKEVQPV | AL       | QLV-LDRALHPEVRMVA | CIVLFETPS               | VALISSLAG   |           |             | 225         |         |          |       |        |     |     |     |   |    |    |     |   |   |   |   |   |   |   |   |    |    |    |   |   |   |   |   |   |   |   |   |   |   |   |   |   |   |   |   |   |   |   |   |   |   |   |   |     |   |   |   |   |   |   |   |   |   |   |     |     |     |     |     |     |     |
| Vtg_Lamprey                 | 150 | LKAL | GNAGQPNISIKKI       | QRFVLQAE  | A     | IMALRNI        | AKRVDQEI | VL                | IF-INVAIKSELRIR         | SCIVFFESP   | VALVSMVAV | 225         |             |         |          |       |        |     |     |     |   |    |    |     |   |   |   |   |   |   |   |   |    |    |    |   |   |   |   |   |   |   |   |   |   |   |   |   |   |   |   |   |   |   |   |   |   |   |   |   |     |   |   |   |   |   |   |   |   |   |   |     |     |     |     |     |     |     |
| Vtg1_Nematode               | 151 | LKSI | GNAGLDISV           | NQLEIIV   | RKEA  | DALRLLK        | DMIQKV   | LLP               | IY-KNRQYEF              | ETRMAL      | LWRMMHT   | PEESLLVQVVS | 226         |         |          |       |        |     |     |     |   |    |    |     |   |   |   |   |   |   |   |   |    |    |    |   |   |   |   |   |   |   |   |   |   |   |   |   |   |   |   |   |   |   |   |   |   |   |   |   |     |   |   |   |   |   |   |   |   |   |   |     |     |     |     |     |     |     |
| Vtg5_Nematode               | 151 | LKTL | GNAGIDLSV           | YELVQI    | I     | IRTEA          | DALRLLK  | DMIQKV            | LLP                     | YVY-KNRQKPE | LRMAAL    | LWRMMHT     | PBEPVLAHVVS | 226     |          |       |        |     |     |     |   |    |    |     |   |   |   |   |   |   |   |   |    |    |    |   |   |   |   |   |   |   |   |   |   |   |   |   |   |   |   |   |   |   |   |   |   |   |   |   |     |   |   |   |   |   |   |   |   |   |   |     |     |     |     |     |     |     |
| Vtg6c_Nematode              | 151 | LKTL | ANAGL               | DLSVY     | LEKII | IRTOA          | IESF     | RRLR              | TQMTIGRT                | LMPPVY      | -INRQOP   | QHIRMS      | LALHQQI     | IYTF    | PBESVLSQ | IGN   | 226    |     |     |     |   |    |    |     |   |   |   |   |   |   |   |   |    |    |    |   |   |   |   |   |   |   |   |   |   |   |   |   |   |   |   |   |   |   |   |   |   |   |   |   |     |   |   |   |   |   |   |   |   |   |   |     |     |     |     |     |     |     |
| Vtg_WaterFlea               | 150 | L    | TALGNI              | GHEIIV    | FPVK  | PPIRV          | AKAIF    | ALST              | LAVQK                   | VGLML       | PIF-FNK   | AEET        | ELRM        | LAAL    | TLHS     | YVSP  | QAFVSR | VAL | 225 |     |   |    |    |     |   |   |   |   |   |   |   |   |    |    |    |   |   |   |   |   |   |   |   |   |   |   |   |   |   |   |   |   |   |   |   |   |   |   |   |   |     |   |   |   |   |   |   |   |   |   |   |     |     |     |     |     |     |     |
| Vtg1_Cockroach              | 150 | I    | RALGNT              | GNKR      | IILN  | YLEP           | YLER     | L                 | MVTSLD                  | ILAE        | I         | NARQV       | LYNVY-      | INIGENH | E        | LRCAS | SVILLM | RT  | PPA | AML | Q | RM | AE | 225 |   |   |   |   |   |   |   |   |    |    |    |   |   |   |   |   |   |   |   |   |   |   |   |   |   |   |   |   |   |   |   |   |   |   |   |   |     |   |   |   |   |   |   |   |   |   |   |     |     |     |     |     |     |     |
| Vtg_SilkMoth                | 150 | I    | QALG                | N         | I     | GHRE           | ILK      | V                 | FAP                     | YLR         | TR        | H           | I           | V       | KNL      | K     | T      | L   | A   | K   | L | R  | V  | A   | V | F | S | T | L | - | R | N | T  | A  | B  | P | V | R | V | A | A | I | Q | S | I | F | S | I | S | P | T | G | E | M | M | O | A | M | A | E | 225 |   |   |   |   |   |   |   |   |   |   |     |     |     |     |     |     |     |
| Vtg_Beetle                  | 149 | I    | R                   | A         | L     | G              | N        | V                 | C                       | O           | O         | Y           | I           | L       | E        | A     | F      | E   | P   | Y   | L | Q  | R  | V   | L | M | V | T | A | L | D | R | L  | V  | E  | S | N | G | R | S | V | F | Y | K | L | Y | - | R | N | P | S | E | A | B | P | V | R | V | A | A | V   | Q | L | M | R | T | P | P | A | D | M | L   | Q   | R   | M   | A   | S   | 224 |
| Vtg_PacificOyster           | 150 | F    | K                   | T         | I     | G              | N        | A                 | G                       | L           | W         | E           | M           | I       | P        | T     | I      | R   | T   | Y   | I | L  | R  | T   | Q | A | I | Y | S | L | R | K | L  | A  | R  | H | Y | I | Q | T | T | L | P | L | Y | - | F | D | Q | S | E | K | E | E | V | R | I | G | S | Y | L   | V | M | T | F | P | S | R | Q | L | L | E   | M   | V   | A   | Q   | 225 |     |
| Vtg_GalaxyCoral             | 152 | I    | K                   | T         | L     | G              | N        | A                 | S                       | P           | D         | A           | Q           | P       | L        | Q     | K      | I   | L   | T   | R | V  | E  | C   | V | A | L | R | R | I | T | R | Q  | A  | T  | Y | P | C | L | I | S | I | F | - | A | D | R | Q | E | N | P | E | L | R | M | A | T | F | V | Q | L   | N | T | P | N | F | V | I | L | Q | A | L   | T   | N   | 227 |     |     |     |
| MEP_Fruitfly                | 150 | L    | Q                   | G         | I     | N              | N        | I                 | Q                       | L           | G         | N           | V           | A       | N        | L     | E      | P   | I   | V   | L | K  | F  | Q   | A | A | W | T | L | A | L | A | D  | R  | R  | I | E | V | Y | W | P | I | F | - | E | S | R | N | A | S | E | L | R | V | A | A | V | T | L | L | L   | I | S | P | T | A | A | R | L | I | S | I   | H   | R   | 225 |     |     |     |
| MEP_Beetle                  | 149 | L    | M                   | G         | L     | C              | M        | R                 | L                       | H           | S         | I           | K           | H       | L        | L     | P      | A   | V   | L   | S | L  | W  | A   | V | - | S | T | A | V | E | E | R  | D  | V  | I | E | T | L | W | P | L | F | - | T | N | V | D | E | L | T | E | M | R | T | I | A | F | Y | F | I   | M | T | P | N | D | S | R | L | T | N | M   | F   | N   | 225 |     |     |     |
| CP_SignalCrayfish           | 150 | I    | Q                   | A         | L     | A              | N        | I                 | G                       | I           | P         | O           | T           | I       | D        | V     | L      | K   | H   | F   | A | L  | R  | T   | N | A | I | L | G | L | S | V | Y  | L  | P  | E | V | G | I | L | M | P | V | F | - | E | N | T | G | E | H | N | E | V | R | A | V | A | L | M | M   | T | F | P | S | L | A | W | E | R | I | A   | I   | 225 |     |     |     |     |
| CP_TigerShrimp              | 150 | L    | Q                   | A         | L     | S              | N        | I                 | G                       | T           | P         | O           | T           | I       | N        | V     | L      | K   | P   | I   | M | R  | T  | N   | A | I | W | S | L | S | A | Y | N  | M  | H  | K | I | Y | E | L | M | P | L | I | - | E | N | K | G | E | F | E | I | R | N | A | F | L | T | A | T   | W | P | G | H | A | W | Q | L | A | V | 225 |     |     |     |     |     |     |
| apoCr_Shrimp                | 149 | L    | K                   | A         | L     | G              | N        | M                 | G                       | V           | V         | T           | P           | A       | V        | T     | S      | A   | A   | V   | T | R  | V  | A   | A | A | E | V | F | R | Q | A | K  | -- | C  | A | V | E | K | L | V | D | I | A | - | T | H | P | D | F | T | E | V | R | I | V | S | Y | L | A | A   | I | K | C | A | E | M | D | L | E | K | I   | N   | 222 |     |     |     |     |
| apoCr Crayfish              | 149 | L    | K                   | A         | L     | G              | N        | M                 | G                       | V           | M         | T           | P           | A       | V        | T     | S      | V   | L   | R   | I | R  | V  | A   | A | A | Q | A | F | R | K | A | K  | -- | C  | S | T | G | R | L | V | G | Y | A | - | L | D | S | R | K | T | T | E | V | R | I | A | S | Y | I | A   | A | V | R | C | A | E | K | W | D | F | E   | K   | I   | V   | E   | 222 |     |
| M-177_Mite                  | 150 | V    | R                   | A         | L     | E              | N        | I                 | N                       | V           | N         | T           | E           | D       | V        | D     | N      | M   | I   | N   | A | L  | R  | A   | A | V | N | L | P | S | D | A | -- | S  | R  | Y | K | S | L | V | M | - | - | - | D | E | S | M | P | N | E | A | R | I | A | A | F | H | K | M | Q   | N | G | M | T | H | I | K | D | L | F | A   | 220 |     |     |     |     |     |
| apoLp_Locust                | 150 | L    | K                   | A         | L     | G              | N        | I                 | R                       | H           | L         | N           | N           | A       | L        | G     | E      | K   | V   | K   | O | V  | R  | V   | A | A | E | V | I | Q | S | D | P  | -- | C  | I | K | Q | A | L | Q | L | - | R | D | Q | V | E | S | E | L | R | I | K | A | Y | L | A | V | E | C   | P | D | N | V | V | K | T | I | S | N | 223 |     |     |     |     |     |     |
| apoLp_Fruitfly              | 150 | L    | K                   | G         | L     | G              | N        | A                 | K                       | S           | L         | S           | G           | N       | T        | V     | A      | A   | L   | S   | E | R  | V  | A   | L | H | A | F | S | K | V | K | -- | C  | L  | Q | S | K | S | L | E | L | L | - | K | N | R | N | E | S | E | L | R | I | E | A | Y | L | S | A | I   | S | C | P | N | A | E | V | A | N | C | I   | S   | E   | 223 |     |     |     |
| apoLp_Silkmoth              | 151 | L    | K                   | G         | I     | R              | N        | I                 | R                       | H           | L         | E           | N           | S       | L        | E     | K      | L   | V   | R   | I | R  | A  | A   | V | L | E | A | F | H | A | D | P  | -- | C  | V | K | K | I | S | L | D | I | L | - | K | N | R | Q | L | D | S | E | I | R | I | K | A | Y | L | A   | V | I | E | C | P | C | H | S | A | N | E   | L   | E   | N   | 224 |     |     |
| apoLp_HornWorm              | 151 | L    | K                   | G         | I     | R              | N        | I                 | R                       | H           | L         | E           | N           | S       | L        | D     | I      | K   | L   | V   | H | V  | R  | A   | V | L | E | A | F | H | A | D | P  | -- | C  | I | H | K | T | A | M | D | I | M | - | K | N | R | Q | L | D | S | E | I | R | I | K | A | Y | L | A   | V | I | E | C | P | C | H | S | A | S | E   | L   | K   | N   | 224 |     |     |
| apoB_Human                  | 150 | L    | R                   | V         | I     | G              | N        | M                 | G                       | T           | M         | E           | Q           | L       | T        | P     | E      | L   | K   | S   | I | Q  | K  | A   | A | I | Q | A | L | R | K | M | E  | -- | P  | D | Q | E | V | L | L | Q | T | F | - | L | D | D | A | S | P | G | D | K | R | L | A | A | Y | L | M   | L | M | R | S | P | S | O | A | D | I | N   | K   | I   | V   | Q   | 223 |     |
| apoB_Chicken                | 150 | L    | R                   | A         | I     | G              | N        | M                 | G                       | A           | V         | M           | E           | K       | A        | K     | P      | S   | L   | K   | A | V  | Q  | K   | A | A | I | Q | A | F | R | K | M  | T  | -- | I | D | R | S | A | L | L | K | E | F | - | Q | E | G | D | A | P | T | D | K | R | L | A | T | Y | L   | I | L | M | K | N | P | S | P | A | D | L   | A   | K   | I   | M   | R   | 223 |
| apoB_Zebrafish              | 150 | L    | R                   | V         | I     | G              | N        | M                 | G                       | K           | Y         | M           | E           | G       | F        | P     | S      | L   | K   | S   | S | V  | Q  | K   | A | A | I | Q | A | F | R | L | M  | E  | -- | M | V | R | S | A | L | I | Q | O | Y | - | Q | N | V | E | A | P | A | Q | K | R | I | A | A | Y | L   | M | L | M | R | N | P | E | V | A | E | -   | N   | V   | L   | R   | 221 |     |
| LTP_Silkmoth                | 150 | I    | K                   | A         | L     | G              | N        | I                 | G                       | F           | K         | L           | E           | F       | A        | D     | V      | L   | M   | S   | I | R  | L  | T   | A | I | D | A | F | R | R | T | P  | -- | C  | R | E | Y | F | L | E | T | Y | - | R | E | D | F | V | N | I | E | V | R | I | A | S | Y | I | Q | V   | M | R | C | P | D | L | T | T | V | R | T   | I   | F   | H   | 222 |     |     |
| CG15828_Fruitfly            | 150 | L    | K                   | G         | L     | G              | N        | I                 | G                       | V           | V         | S           | S           | A       | F        | A     | E      | Q   | L   | W   | I | R  | L  | H   | G | I | L | A | F | R | R | V | D  | -- | C  | R | S | Y | F | L | D | N | Y | - | Q | N | Y | T | L | N | S | E | L | R | I | Y | S | Y | L | Q | A   | M | R | C | P | D | Y | I | S | V | G | V   | I   | K   | S   | 222 |     |     |
| similar_to	CG15828_Honeybee | 150 | L    | K                   | A         | L     | G              | N        | M                 | G                       | L           | E         | T           | E           | R       | L        | L     | K      | L   | K   | E   | I | R  | V  | A   | S | I | D | A | H | R | R | M | P  | -- | S  | D | L | Y | F | L | N | Y | - | R | N | F | S | L | D | E | L | R | I | A | S | Y | L | Q | V | M | R   | C | P | D | N | V | V | K | T | I | K | H   | 222 |     |     |     |     |     |
| MTP_Human                   | 150 | L    | L                   | A         | L     | K              | N        | A                 | L                       | L           | P         | E           | G           | I       | P        | S     | L      | L   | K   | Y   | A | L  | T  | T   | A | L | Q | R | Y | D | L | P | F  | I  | T  | D | V | K | K | T | N | R | I | Y | H | Q | N | R | K | V | H | - | E | V | R | T | A | A | A | A | I   | I | L | N | P | S | Y | M | D | V | K | N   | L   | L   | 225 |     |     |     |
| MTP_Chicken                 | 150 | L    | L                   | A         | L     | K              | N        | A                 | L                       | L           | P         | E           | A           | I       | P        | L     | L      | K   | Y   | A   | A | V  | T  | A   | L | Q | R | Y | D | P | S | F | L  | T  | N  | V | K | K | T | N | R | I | Y | H | Q | N | R | K | V | H | - | E | A | R | T | A | A | A | I | I | L   | N | P | S | Y | M | E | V | K | N | L | L   | 225 |     |     |     |     |     |
| MTP_Zebrafish               | 150 | L    | L                   | A         | L     | K              | N        | A                 | L                       | L           | P         | E           | G           | I       | P        | V     | L      | T   | K   | Y   | A | I  | A  | I   | T | A | L | Q | R | Y | D | P | A  | L  | I  | T | A | V | K | K | A | N | R | I | Y | H | - | Q | N | Q | R | I | Y | E | R | A | A | A | D | V | M   | S | S | P | S | Y | M | E | V | K | N | L   | L   | 225 |     |     |     |     |
| MTP_Nematoda                | 151 | L    | E                   | V         | L     | E              | N        | I                 | P                       | I           | F         | G           | S           | Y       | T        | F     | A      | K   | F   | I   | V | Q  | K  | A   | L | N | V | I | L | A | S | K | N  | L  | T  | H | K | L | I | K | L | F | R | - | N | T | C | S | O | - | E | H | S | O | A | I | D | I | L | L | K   | C | P | D | H | Q | N | V | A | T | L | L   | 225 |     |     |     |     |     |
| MTP_Fruitfly                | 150 | I    | R                   | A         | L     | O              | N        | L                 | Q                       | D           | P         | A           | T           | E       | A        | L     | L      | E   | H   | L   | S | V  | A  | L   | L | Q | A | L | K | A | P | L | G  | S  | H  | R | L | Q | E | S | I | F | Y | O | R | K | R | R | F | - | D | A | R | T | L | A | L | I | L | S | L   | T | Q | E | Q | L | G | N | F | L | D | 225 |     |     |     |     |     |     |

|                | N10 | N11    | N12    | N13  | N14  | N15          |            |       |     |     |       |      |    |      |        |    |   |   |      |   |     |   |   |   |   |   |   |   |   |   |   |   |   |   |   |   |   |   |   |   |   |     |   |   |   |   |   |   |   |   |   |   |   |   |     |
|----------------|-----|--------|--------|------|------|--------------|------------|-------|-----|-----|-------|------|----|------|--------|----|---|---|------|---|-----|---|---|---|---|---|---|---|---|---|---|---|---|---|---|---|---|---|---|---|---|-----|---|---|---|---|---|---|---|---|---|---|---|---|-----|
| Vtg2_Chicken   | 226 | VAMKES | KTNMOV | -AS  | -FVY | SHMKSLSYSKVI | RADTYFD    | NYRVG | EIV | VNS | PRMT  | FP   | SE | VGIR | VEGLAD | VI | V | S | AYLK | I | 300 |   |   |   |   |   |   |   |   |   |   |   |   |   |   |   |   |   |   |   |   |     |   |   |   |   |   |   |   |   |   |   |   |   |     |
| Vtg1_Zebrafish | 226 | ALRTE  | --P    | NMHV | -AS  | -FAY         | SHIKSLTYS  | RAF   | KMD | YYT | PLMIG | SAYM | N  | D    | A      | A  | T | I | L    | P | R   | E | F | G | V | R | T | G | G | I | H | E | A | L | A | S | A | Y | V | K | V | 298 |   |   |   |   |   |   |   |   |   |   |   |   |     |
| Vtg_Lamprey    | 226 | RLRRE  | --P    | NLQV | -AS  | -FVY         | SQMRSLSYSK | A     | V   | H   | V     | D    | T  | F    | N      | A  | R | T | M    | A | A   | D | F | R | I | N | S | P | S | G | E | L | P | R | E | F | G | L | R | A | E | G   | L | Q | E | L | L | A | S | G | Y | V | K | V | 298 |
| Vtg1_Nematode  | 227 | QMEKE  | --T    | NQOV | -AA  | -L           | H          | Q     | M   | I   | R</   |      |    |      |        |    |   |   |      |   |     |   |   |   |   |   |   |   |   |   |   |   |   |   |   |   |   |   |   |   |   |     |   |   |   |   |   |   |   |   |   |   |   |   |     |

|                             |     |                                                       |     |
|-----------------------------|-----|-------------------------------------------------------|-----|
| Vtg2_Chicken                | 301 | LGQEVAFININKELLVESCLGLPLEYGSPSLYVHTVATMGVNTTEYFOHA    | 349 |
| Vtg1_Zebrafish              | 299 | FGQEVAVVNFDKTIIILPTAVGVPMEFWSWPSVALQTFVAVMGVNTAFIQAA  | 347 |
| Vtg_Lamprey                 | 299 | HGQEVVFAELDKKMMQPVCIIGIPMDLNLTSMSQHAVAIMGLTTDLAKAG    | 347 |
| Vtg1_Nematode               | 297 | KDMDYAILFVDTQLIFPTTLGLPLIVSGPSVAATHVYEMRMFTPLFEQG     | 345 |
| Vtg5_Nematode               | 297 | KEMDYIVLFPIDMETIIPPTTIGMPLTISGPTVATTHVTEMRFWYVPIEQG   | 345 |
| Vtg6c_Nematode              | 297 | RDMDYAFLPIDADSIPTMGLFVQFTSPRVASTHVLSLRVICPIAEVG       | 345 |
| Vtg_WaterFlea               | 295 | LDNYQRFFINPNNTIIPBSAMGLAYTWASPVVSVKMSVTRLMVETPFSTRAY  | 343 |
| Vtg1_Cockroach              | 299 | LGNDRFFSY-DKNDIFPNALGLPSLFTIPWKLGARSETSLTYSVKEMSK     | 346 |
| Vtg_SilkMoth                | 298 | MNNQRLFSFSESDLQFPEVASGMPFIFKYPSKDNKYEAMNMIKDVQFTYA    | 346 |
| Vtg_Beetle                  | 298 | NAWQEIFSF-DNHTLLPTALGLPFVYVYPRISTEGHIQKPRVHAEFEI      | 345 |
| Vtg_PacificOyster           | 299 | MGNELQYITLDGTLVIPSCEGLPLRLKLPSTVLFQLRGEMEMDAEYFKMG    | 347 |
| Vtg_GalaxyCoral             | 302 | YGNQEVKFMVVKQDVVLPVLAGIPLNIQFPSINTHVHAVVAIHTPFLRVG    | 350 |
| MEP_Fruitfly                | 298 | BGKTVLSYYLNQRMFVPTVLGTSSDVLVRSRSYNPFLNLDHEINREQG      | 346 |
| MEP_Beetle                  | 297 | HGHIVNTYFFDQHSIIPDGLIPALWEYPFVDVWQGVNRYHSYDAVWPL      | 345 |
| CP_SignalCrayfish           | 298 | TDPISLTPVLSSPENLPTDGLPFMIHYPTKRKDFADLTLDPSQDNTLE      | 346 |
| CP_TigerShrimp              | 298 | DRLLIYVALQYHFMEGFPTETIGIPEFSVLYTSGKMKVNVDFIPEFSQVQFV  | 346 |
| apoCr_Shrimp                | 296 | MQQEVTYANIAETLKLPTIQGLHSRSPWGLSIHTTGFVGFDAFIKAG       | 344 |
| apoCr_Crayfish              | 296 | MQQEISFASLAGDLTFPTIQGTIPFKLKMPSLSVEVDGFGVYDCHISKTG    | 344 |
| M-177_Mite                  | 293 | NGKNVYVTDVFDLKLPTITGLPLVYKFPFLVDMDIQKKEHSLLLRFNTK     | 341 |
| apoLp_Locust                | 297 | FGSELAWFNYDGKHEYPTNLGFPLKLAIPSAAVELTGKLLVDAYVVEGG     | 345 |
| apoLp_Fruitfly              | 297 | FGSELAFLSLGDNIPTPTSIGVPELVAPSVDINANVQIGFNAQVLSGTG     | 345 |
| apoLp_Silkmoth              | 298 | FGTDAVFLSFGDDKGYPTSTGLPLHLNLPSTDFEISGAFIIDADAFSTG     | 346 |
| apoLp_HornWorm              | 298 | FGTDAVFLSFGDDKGYPTSVGLEPLRLNLPSTDFEISGAFIIDADAFSTG    | 346 |
| apoB_Human                  | 297 | LGEEELGFASLHDLQLLPTGAGLQIQISSPSVSVFVNTMGIIPDFARS      | 345 |
| apoB_Chicken                | 297 | LGEEELGYMKLSDFKLLPTGAGLQKFAIPSVAVEFVTHLGINMPEFARS     | 345 |
| apoB_Zebrafish              | 291 | FGTELGYLKTSDLKHLPTSAAGFPLKLTLPSTVGVFEFVITQMGVYIPEFVVA | 339 |
| <b>LTP_Silkmoth</b>         | 296 | FGNEISYWSAEGDDEVPTGCGPLNMLNLPSTAVNVAAATMSVAGGLSSS     | 344 |
| CG15828_Fruitfly            | 295 | LGYKLYDYNNPRAQVPLAVGLPLAIHAPSVSVDVITTMQTDMFWEQSG      | 343 |
| similar_to_CG15828_Honeybee | 296 | FGNDLKYSTLNGDREVEMTTGLVRLDLPSTINVDTTGSMTVDAFYKTAG     | 344 |
| MTP_Human                   | 296 | SGDPIISVVKGLLILLINRVTVVITTDITVPEFRQFEKKYERLSTGRGYVSQ  | 344 |
| MTP_Chicken                 | 296 | TGDPISVVKGLLILLNRIAMFVAGNAEVPFRHSVTKYESLPSGRRYTAR     | 344 |
| MTP_Zebrafish               | 296 | SGDPIINVVKGLLILLNTRGALVVICNMTVPEFRETIVSKQEKLPQMFSTRK  | 344 |
| MTP_Nematoda                | 294 | DGRTHKAFEGHVPRYTSGLHLTASLYINQKTVVQDQIGKHKKKTINR       | 342 |
| MTP_Fruitfly                | 293 | SASDSTPAYQATTLSQNTIGSAVLGHLAVLKQTNVRSVFLQSVDRPYAKH    | 341 |

**N20**

**N21**

**N22**

Supplemental Fig. 3

**B.mori LTP-III**

D.plexippus (EHJ73751.1) 0 ----- 0

D.plexippus (EHJ73750.1) 0 ----- 0

D.ponderosae (ABE62911.1) 0 ----- 0

T.castaneum (XP\_972731.1) 0 ----- 0

A.florea (XP\_003697952.1) 0 ----- 0

A.mellifera (XP\_395658.4) 0 ----- 0

B.impatiens (XP\_003492016.1) 0 ----- 0

M.rotundata (XP\_003708008.1) 0 ----- 0

N.vitripennis (XP\_001606118.1) 0 ----- 0

S.invicta (EFZ14465.1) 1 ----- MLHRCVP 7

A.echinatior (EGI63413.1) 0 ----- 0

H.saltator (EFN76863.1) 0 ----- 0

C.floridanus (EFN74421.1) 0 ----- 0

A.aegypti (XP\_001654113.1) 1 ----- MHRQNTAGSGVEVPTTESPKVNTQSLCKLTHPAQTDTIISDDLRSVSVIIPK 53

A.aegypti (XP\_001653919.1) 0 ----- 0

C.quinquefasciatus (XP\_001863022.1) 0 ----- 0

A.gambiae (XP\_312626.4) 0 ----- 0

A.darlingi (EFR25164.1) 0 ----- 0

D.virilis (XP\_002052633.1) 0 ----- 0

D.mojavensis (XP\_002002021.1) 0 ----- 0

D.grimshawi (XP\_001989184.1) 0 ----- 0

D.willistoni (XP\_002064455.1) 0 ----- 0

D.simulans (XP\_002078032.1) 0 ----- 0

D.sechellia (XP\_002045314.1) 0 ----- 0

D.melanogaster (NP\_608781.2) 0 ----- 0

D.melanogaster (AAL68365.1) 0 ----- 0

D.melanogaster (AAL48116.1) 0 ----- 0

D.erecta (XP\_001968564.1) 0 ----- 0

D.yakuba (XP\_002087828.1) 0 ----- 0

D.ananassae (XP\_001965094.1) 0 ----- 0

D.pseudoobscura (XP\_001356411.1) 0 ----- 0

A.pisum (XP\_001945904.1) 1 MKTTVAVVAIALSLCGLFPFVTVVALPVPDGGQNESVAAATELQTTTVLPVDTTTEVSPTSATVPTDT 67

A.pisum (XP\_001948728.2) 0 ----- 0

P.humanus corporis (XP\_002425163.1) 0 ----- 0

D.pulex (BFX77001.1) 0 ----- 0

**B.mori LTP-III**

D.plexippus (EHJ73751.1) 1 ----- MKIALCIVLVILFQFRNCQEIPEEVSSSEDE----- 30

D.plexippus (EHJ73750.1) 1 ----- MFNKIVVIVLFLCSSVLGDLQDV-----TT 25

D.plexippus (EHJ73750.1) 1 ----- MCIVRLTLLLLITIVKSQDENEYFESTDSDEFF-----ET 35

D.ponderosae (ABE62911.1) 1 ----- MTRTVVLLLLLGGWLVGGAP----- 21

T.castaneum (XP\_972731.1) 1 ----- MRSGLIFLLLLSLNFCHSEVRNA----- 23

A.florea (XP\_003697952.1) 1 ----- MKLLKLEFFVLFYFIKINQCDIKISTV-----KN 28

A.mellifera (XP\_395658.4) 1 ----- MKVLKLEFFVLFYFIKIGQCDIKISTV-----KN 28

B.impatiens (XP\_003492016.1) 1 ----- MVVHFD RSKPEMHLPKLFLFSFFIAIGQCDVQNSIG-----KD 40

M.rotundata (XP\_003708008.1) 1 ----- MQFSKLEFVYFA YCTLVCFCDVQQSFG-----KN 28

N.vitripennis (XP\_001606118.1) 1 ----- MAREALVVFAS TLLLLLILSCQSARSDEAPA-----AT 32

S.invicta (EFZ14465.1) 8 GSAKKGINMQCETRS EMRVYAMVFLVMCCFLCSPCAGEE--PKPNVSSPSID-----N 58

A.echinatior (EGI63413.1) 1 ----- MRCKTRLEMRVYAVVFLIVCCFLCSCCASEE-LKTNNA-STSID-----K 43

H.saltator (EFN76863.1) 1 ----- MQIYAAFLVVMCCFLCPLCAGDD-LKLDASSSSISK-----SK 38

C.floridanus (EFN74421.1) 1 ----- MRAAILLVCCFLCCLCAGDES KKLNDISSSSIN-----DK 36

A.aegypti (XP\_001654113.1) 54 KTDVETCPQTIETVMFRARLLIALLFNCLLISTVR-----CDEDKSSSAB-----ESSPED 105

A.aegypti (XP\_001653919.1) 1 ----- MDRERIHPPQYLACSSVVMIMLFCGIIYFILQVII--LHVS PGR-----SQ 44

C.quinquefasciatus (XP\_001863022.1) 1 ----- MTKPRWKRLTALLINCTLLALISNVR--CDDKSSSGE-----DSTSD 43

A.gambiae (XP\_312626.4) 1 ----- MTMAKAVIALLWINLICLISVVV--CTTDAWP-----NNGG 34

A.darlingi (EFR25164.1) 1 ----- MDDPQSEVPLTRHFEHFAAIRLIRC--TLFERSS--CSGHAWTIVSVQTESRGQCRTKSVG 57

D.virilis (XP\_002052633.1) 1 ----- MKSLIVLLVALLILAY-----NVPAQAQDEN-----EAEGG 31

D.mojavensis (XP\_002002021.1) 1 ----- MKVLIIVFLVAYLILG--SVRAQDENAE-----ANDEN 30

D.grimshawi (XP\_001989184.1) 1 ----- MKALIVILVAIALIH-----CSSAQDVN-----EADDE 28

D.willistoni (XP\_002064455.1) 1 ----- MYNLIIVILMGIGLLAHGTAAIQRELNEIPGAMDQD-----AGNET 40

D.simulans (XP\_002078032.1) 1 ----- MKPLIVVVLVGLLASGCHIVH--SQEPGDAVEQ-----EASES 36

D.sechellia (XP\_002045314.1) 1 ----- MKPLIVVVLVGLLASGCHIVH--SQEPGDAVEQ-----EASES 36

D.melanogaster (NP\_608781.2) 1 ----- MKPLIVVVLVGLMASGCHIVH--SQEPGDAVEQ-----EASES 36

D.melanogaster (AAL68365.1) 1 ----- MKPLIVVVLVGLMASGCHIVH--SQEPGDAVEQ-----EASES 36

D.melanogaster (AAL48116.1) 1 ----- MKPLIVVVLVGLMASGCHIVH--SQEPGDAVEQ-----EASES 36

D.erecta (XP\_001968564.1) 1 ----- MKPLIVVLVGLLASGCHIVH--SQDPGEVVEQ-----EASES 36

D.yakuba (XP\_002087828.1) 1 ----- MKPLIVFVLVGLLASGCHIVH--SQEPGEAVEQ-----EASES 36

D.ananassae (XP\_001965094.1) 1 ----- MMKPLIIIAWL--MATSCYLVS--SQES-EAAEQ-----EVEKS 34

D.pseudoobscura (XP\_001356411.1) 1 ----- MKPLIGFLLVGLLMCAQQTQ--PQDVDAIVEQ-----EAGET 35

A.pisum (XP\_001945904.1) 68 TTEIVNETTAEPLTNTDNDVPTTTEDVVPTTTEBEVPTTTEDVVPTNDDVVPTLELATSEATTAV 134

A.pisum (XP\_001948728.2) 1 ----- MKTNIILVIIFMLNTKCLCQFYAFD-----DDV 28

P.humanus corporis (XP\_002425163.1) 1 ----- MFVNSNDKFTIN----- 12

D.pulex (BFX77001.1) 1 ----- MKWLSVFFLVFLCASGTEIEPGDPEDIGDPAPQGTAPPQTQSDLEETK----- 49



**B.mori LTP-III**  
D.plexippus (EHJ73751.1) 31 ---KLSEGEKKLSHNILAIIEHYKQDPDTGLPGAKLPDFYVPVDPVKQSLTLG-TMHFKNIALYGTN 92  
D.plexippus (EHJ73750.1) 26 TTESQLAKGEEKMSEYILKVLVLEHFQKQNFVGLPGAKVPDFHKVVDPMKHSVSIIG-TLYFKNTSVYGIS 91  
D.plexippus (EHJ73750.1) 36 TTISQLKDGEOKMSEYILKVIIEHYKQPNPEGLPGVGS-QEYSVPDSRKS VGLFSSIDFIDTEVYGIN 101  
D.ponderosae (ABE62911.1) 22 -----DGEQKLSSETLLAIIEHYKQKDPVGVPGAPIPDFLPIPPMNHSSFSVG-KMNFQDMQLYGLK 80  
T.castaneum (XP\_972731.1) 24 QOKQIIEKQEKKISEYILQIIEHYKQKDDPVGIPGAPIPDFLLIPELAHSSFLG-KMNFENVKLYGLS 89  
A.florea (XP\_003697952.1) 29 DTAALGALGKRELDHVRRAILKHYQSDPVGVLPGAPIPDFMSAPDMKYSFSMY-TMNFQKMNLYGLS 94  
A.melifera (XP\_395658.4) 29 DTAALGALGKRELDHVRRAILKHYQSDPVGVLPGAPIPDFMSAPDMKYSFSMY-TMNFQKMNLYGLS 94  
B.impatiens (XP\_003492016.1) 41 DTTAALGALGKRELDHVRRAILKHYQSDPVGVLPGAPIPDFMPVDMKHSFSMY-TMNFQKMNLYGLS 106  
M.rotundata (XP\_003708008.1) 29 DTAALGALGKRELDHVRRAILKHYQSDPVGVLPGAPIPDFMPVDMKHSFSMY-TMNFQKMNLYGLS 94  
N.vitripennis (XP\_001606118.1) 33 STSAQIAQGEKRLGDIIRAILKHYQSDPVGVLPGAPIPDFMDVPMKQSFMSF-TMNLNSIKVYGLS 98  
S.invicta (EFZ14465.1) 59 NKTQMAAGEQRLGDIIRAILKHYQKDDPVGVLPGAPIPDFMSVPMKHSFSMY-TMNFQKISVSGLS 124  
A.echinator (EGI63413.1) 44 KTAALGALGAEQRLGDIIRAILKHYQKDDPVGVLPGAPIPDFMPVDMKHSFSIN-TINLKKISVYGLS 109  
H.saltator (EFN76863.1) 39 ADQAGMAAGEQRLGDIIRAILKHYQKDDPVGVLPGAPIPDFMPVDMKHSFSMY-TMHFKQINVYGLA 104  
C.floridanus (EFN74421.1) 37 NKAALGALGAEQRLGDIIRAILKHYQKDDPVGVLPGAPIPDFMSVPMKHSFSY-TMHFKQINVYGLS 102  
A.aegypti (XP\_001654113.1) 106 VDKHNQOVGSESLISALNNAVIDLYKQEDPVGVLPGATVPDFMPIPEIKQSFSIA-KMHMKNVLAYGLS 171  
A.aegypti (XP\_001653919.1) 45 YRFQKTPRYDRRFSTQLFHVLEFYKQDDPVGVLPGASIPDFLSIPDFRQSTIAFT-AMEMRDLYTYGLS 110  
C.quinquefasciatus (XP\_001863022.1) 44 ADDHAKATGESLISALFAIIDLYKQEDPVGVLPGATVPDFMPIPEIKQSFSIA-KMHMKNVLAYGLS 109  
A.gambiae (XP\_312626.4) 35 RSTVDQELGSEMLTKQLFAIIDLYKQDDPVGVLPGASIPDFMPIPEIKQSFSFA-KMLHKNVLAGRMS 100  
A.darlingi (EFR25164.1) 58 DRARKQETGALSDQLFAIIDLYKQEDPVGVLPGATVPDFMPIPEIKQSFSIA-TIYMTKMVYVYGLS 123  
D.virilis (XP\_002052633.1) 32 DEAQEIEASKNKLAQIEALIEHYKQEDPVGVLPGAPVPDFIEVPMKAKMNGIS-NLNMMKKVAYGLS 97  
D.mojavensis (XP\_002002021.1) 31 DEAHNIEAQNRAVAQIEGLEHYKQEDPVGVLPGAPIPDFMDVPMKAKSLGMA-NLNMLKVKAYGLS 96  
D.grimshawi (XP\_001989184.1) 29 TDAHNIIEVSNRVAQIEAVLEHYKQKDPVGVLPGAPIPDFVDVPTDTSNSLGMMA-NLNMRKVKAYGLS 94  
D.willistoni (XP\_002064455.1) 41 NEDHNINASQNRVAQIEAVLEHFQKADPVGVLPGVVPDFMEVPMKKSLSGMA-NLNMMKVRAYGLS 106  
D.simulans (XP\_002078032.1) 37 DDALKIKESQASIAAQVEAMLVHFQEDPQGLPGVVPDFLEVPNVKKSMSGMA-NLDMKQVKAYGLS 102  
D.sechellia (XP\_002045314.1) 37 DDALKIKESQASIAAQVEAMLVHFQEDPQGLPGVVPDFLEVPNVKKSMSGMA-NLDMKQVKAYGLS 102  
D.melanogaster (NP\_608781.2) 37 DDALKIKESQASIAAQVEAMLVHFQEDPQGLPGVVPDFLEVPNVKKSMSGMA-NLDMKQVKAYGLS 102  
D.melanogaster (AAL68365.1) 37 DDALKIKESQASIAAQVEAMLVHFQEDPQGLPGVVPDFLEVPNVKKSMSGMA-NLDMKQVKAYGLS 102  
D.melanogaster (AAL48116.1) 37 DDALKIKESQASIAAQVEAMLVHFQEDPQGLPGVVPDFLEVPNVKKSMSGMA-NLDMKQVKAYGLS 102  
D.erecta (XP\_001968564.1) 37 DDALKIKESQANIAAQVEAMLVHFQEDPQGLPGVVPDFLEVPNVKKSMSGMA-NLDMKQVKAYGLS 102  
D.yakuba (XP\_002087828.1) 37 DDALKIKESQAKIAAQVEAMLVHFQEDPQGLPGVVPDFLEVPNVKKSMSGMA-NLDMKQVKAHGSL 102  
D.ananassae (XP\_001965094.1) 35 NDEHNIEVSNRVAQIEAVLEHFQKADPVGVLPGAAIPDFIEVDAKKNLGMMA-TLDMKHKVAYGSS 100  
D.pseudoobscura (XP\_001356411.1) 36 DEEHNIEATQNRMAAQVEAVLEHFQKADPVGVLPGVVPDFIDVPMKKNMGFG-NLDMKQVKAYGLS 101  
A.pisum (XP\_001945904.1) 135 NNTLPEVEVVKDKLSEQIRKILKHYQHDPVGFPGAPIPDFLSIPPMNKDFGVA-FMTFKNMTVHGLS 200  
A.pisum (XP\_001948728.2) 29 PSLSEADERIINLTLLTKNVLEHYQNDDPVGVLPEAVPEYSDPEIPDNETPL--WSMHNSTMKGHS 93  
P.humanus corporis (XP\_002425163.1) 13 --HHEQLLFQKKISEQLIQILNHYKQEDPIGLPNAVPPDMAIPDMKHSFSVA-TMNFKNSSVHGLS 76  
D.pulex (BFX77001.1) 50 -----IELSLDARIRQLIEHYKQDDPLGIPGVPIPEMPIDPEEGDFPAA-KIKFSEABLQQLS 107

**B.mori LTP-III**  
D.plexippus (EHJ73751.1) 93 EFRNLVYKADIGAMEAHAVMTLEKLOARQNYTFATWFNSVRGP-FTVHITGLRVTAAGLOVERDQK 158  
D.plexippus (EHJ73750.1) 92 KFRILNINAEIGAMEVHAALADKLOAKGNYTMTWLNRVQGP-YTFVDITGIVKMAKANLGVVERDQK 157  
D.plexippus (EHJ73750.1) 102 KFRVIYVNLIDENMEGRAALEIDNLHIRGRYALNAFLNSNYGG-FTANITGIKITALTTLGVERDQK 167  
D.ponderosae (ABE62911.1) 81 KFRIEHVTLDAALRLQAALLIDVMDVGLNYTLKTFWSSAQGP-FTVKLSGVFVQATATLEVLNDGR 146  
T.castaneum (XP\_972731.1) 90 KFRITHIKADITAMKVEAALTIKTLQVKNYTLRTFMSSAKGP-FTVKLTDDVYVKAATLEVERNGQ 155  
A.florea (XP\_003697952.1) 95 KFRIVNAESLALMQVSVTLNIESLDIRGFYTLSSWLSRSAGN-FTMKLMGVNVKIGRLEVASDQK 160  
A.melifera (XP\_395658.4) 95 KFRIVNAESLALMQVSVTLNIESLDIRGFYTLSSWLSRSAGN-FTMKLMGVNVKIGRLEVASDQK 160  
B.impatiens (XP\_003492016.1) 107 KFRIVNMESELALMQVSVTLNKNLNRGFRYTLSSWLSRSAGN-FTVKLSGVNVKIGRLEVASDQK 172  
M.rotundata (XP\_003708008.1) 95 KFRIVHMESELALMQVSVTLNIESLDIRGLYTLSSWLSRSAGN-FTVKLTENVIQIARLEVADDQK 160  
N.vitripennis (XP\_001606118.1) 99 KFRIEHIRSELALMQVSVGLDIEENLDIKGLYTLSSWISSAGD-FTVKLTGVKVEGLAKLEVGNDQK 164  
S.invicta (EFZ14465.1) 125 KFRITHVESLALMQVFAVRIDNLNMRGLYTLSSWLSRSAGD-FTVNLTDDVNVKIGARLEVGNDQK 190  
A.echinator (EGI63413.1) 110 KFRIEHMESELALMQVFAVRIDILDIRGLYTLSSWISSRSEG-FMVKLTGVKVEGIARLEVNTDQK 175  
H.saltator (EFN76863.1) 105 KFRIEHVESLALMQVFAVRIDILDIRGLYTLSSWLSKAGD-FSVKLTGVNVKIGARLEVNTDQK 170  
C.floridanus (EFN74421.1) 103 KFRIEHVESLALMQVFAVRIDSLVHGLYTLSSWLSRSTGN-FTSKLTGVNVKIGARLEVNTDQK 168  
A.aegypti (XP\_001654113.1) 172 KFRIKMFKTELTNTMKVQGTGVQIDEMLVKGNYSSTFFNRAEGP-FTVVILKNVMTKGNVSLVDRDQK 237  
A.aegypti (XP\_001653919.1) 111 RLRIRLFQAKLSSMVLRLVLSDELLELVNYSYAIN--MGSSGP-FWLKMKNVRTMGNVSLGVDRDQK 173  
C.quinquefasciatus (XP\_001863022.1) 110 KFRIKLKFTELTNTMKVQGTGVQIDEMLVKGNYSSTFFNRAEGP-FTVVILKNVMTKGNVSLGVDRDQK 175  
A.gambiae (XP\_312626.4) 101 RFRIRYFHTELSRMSVTLVALEIDETVNGNYTMTFFNRAEGP-FNVVMRNVLTKANVSLAVERDQK 166  
A.darlingi (EFR25164.1) 124 RFRIRYFHTELSRMSVTLVALEIDETVNGNYTMTFFNRAEGP-FTVVILKNVMTKGNVSLAVERDQK 166  
D.virilis (XP\_002052633.1) 98 KFRIASINADFKEMMAKAGIQDQMLVKGNYTLSSFFSKTNGP-FTVVILKNVYVRCVATLGVVERDGH 163  
D.mojavensis (XP\_002002021.1) 97 KFRISTVDVDFKMKKAEAGIQDQMLVKGNYTLSSFFSKANGP-FTVVILKVVYVRCVATLGVVERDGH 162  
D.grimshawi (XP\_001989184.1) 95 KFRIASINADFKEMMEAGITLDEMLVKGQDYLSSFFSKANGP-FTVVILKVVYVTSASLIVKRDGH 160  
D.willistoni (XP\_002064455.1) 107 KFRITATINADFKDLQVQKAGIQDQMLVKGNYTLSSFFSKANGP-FTVVILKVVYVTSASLIVKRDGH 172  
D.simulans (XP\_002078032.1) 103 KFRIDKMNLDLKEKRFNGGLQDQMLVKGQYTLSSFFSKANGP-FTVVILKNVYAEATAFLAVERDQK 168  
D.sechellia (XP\_002045314.1) 103 KFRIDKMNLDLKEKRFNGGLQDQMLVKGQYTLSSFFSKANGP-FTVVILKNVYAEATAFLAVERDQK 168  
D.melanogaster (NP\_608781.2) 103 KFRIDKMNLDLKEKRFNGGLQDQMLVKGQYTLSSFFSKANGP-FTVVILKNVYAEATAFLAVERDQK 168  
D.melanogaster (AAL68365.1) 103 KFRIDKMNLDLKEKRFNGGLQDQMLVKGQYTLSSFFSKANGP-FTVVILKNVYAEATAFLAVERDQK 168  
D.melanogaster (AAL48116.1) 103 KFRIDKMNLDLKEKRFNGGLQDQMLVKGQYTLSSFFSKANGP-FTVVILKNVYAEATAFLAVERDQK 168  
D.erecta (XP\_001968564.1) 103 KFRIDKMNLDLKEKRFNGGLQDQMLVKGQYTLSSFFSKANGP-FTVVILKNVYAEATAFLAVERDQK 168  
D.yakuba (XP\_002087828.1) 103 KFRIDKMNLDLKEKRFNGGLQDQMLVKGQYTLSSFFSKANGP-FTVVILKNVYAEATAFLAVERDQK 168  
D.ananassae (XP\_001965094.1) 101 QFRIDKLSADFKEMKINGGLQDQMLVKGQYTLSSFFSKANGP-FTVVILKNVYAEATAFLAVERDGH 166  
D.pseudoobscura (XP\_001356411.1) 102 KFRIDTVADADLKSMMKIKGGVQDQMLVKGKYNLASWISRAQGP-FTVVILKNVYAEATAFLAVERDGH 167  
A.pisum (XP\_001945904.1) 201 KFKVENVNTDLKNMRYVLLKIKRMYVGLNYTLRSWLSRSPASGPNVTLTIDVEAAAEALPEADGN 267  
A.pisum (XP\_001948728.2) 94 KFRILKLYVNLVDLQLEFGISIDTLVVVGNYSYWKMYD---GYNVTLTLQHLIDGHSLSLQVSESGH 156  
P.humanus corporis (XP\_002425163.1) 77 IFRIEKIESNVADMEVFLVAMSTEQLLIKGQYTMSTWFSRQGGD-FNVTLSSGLIKGLASMEVNQNGQ 142  
D.pulex (BFX77001.1) 108 QFRINVYRTDLKDLKVIWIGMTFDTLQVGRYRMSWFS-TSSGDFNVTLIRVHAEGFAGLVVDSGL 173

B.mori LTP-III 159 IRAENIVMDLSASNIIVNLENA --- EIIISGFINTIGPFIFDSIKFVYLKEAYATIKTTMNEKIDEV 221  
D.plexippus (EHJ73751.1) 158 LRAQDIKIDISFSTISMNFNENAGFFGMLQGVNSIGTFIFDSIKFVYLKEAYTKAREEINKKLDEV 224  
D.plexippus (EHJ73750.1) 168 LRAHDIITMDVNFNNIAVNFENSGLLVGLLQGLFNSIGTILFESIKFNLLKEAYTNMRTIEINKKLDQV 234  
D.ponderosae (ABE62911.1) 147 LEAQDIAMDVTFKDMALDFQGLGFFASMFQGVNSVGFVFDISKFPVLSANANIRREVNKQAARM 213  
T.castaneum (XP\_972731.1) 156 LEAQDMDMDITFKGIAMDFKGLGFFANMFOGVNSVGTFFIFDSIKFPILREVTNLRNDVNVKQVKKV 222  
A.florea (XP\_003697952.1) 161 LQAQNI DMDLTFENIAMDFKNLGFLGSLVQSTINSVGSFIFDSIKFPILKEINTKARGIANKQISQL 227  
A.mellifera (XP\_395658.4) 161 LQAQNI DMDLTFENIAMDFKNLGFLGSLVQSTINSVGSFIFDSIKFPILKEINTKARGIANKQISQL 227  
B.impatiens (XP\_003492016.1) 173 LQAQNI DDLITFEKIDMDFKNLGFLGSLVQSMINSVGTFFIFDSIKFPILKEINTKARGEANKQISQL 239  
M.rotundata (XP\_003708008.1) 161 LQAQNI DMDLTFDKIDMDFKNLGFLGSLVQGVINSIGTFIFDSIKFPILKEVNTNIRGEVNVKQISQL 227  
N.vitripennis (XP\_001606118.1) 165 LHAQDI VMDLTFENIDLDFKNLGFFASLFOGVNSVGSFVFDISKFPVYLQEVNTNVRGEVNVKHISTL 231  
S.invicta (EFZ14465.1) 191 LQAQNI DDLNLFFDKIQLNFNENLGLGSLVQFQIINSVGTFFIFDSIKFPILKEVNTNVRGEVNVKQISQL 257  
A.echinator (EGI63413.1) 176 LQAQNI DMDLTFDKIDLDFKNLGFLGSLVQGVINSVGSFIFDGIKFPILKEVNTNIRGEVNVKQISQL 242  
H.saltator (EFN76863.1) 171 LQAQNI DMDLTFDKIDLDFKNLGFLGSLVQGVINSIGTFMFDISKFPILKEVNMNVRGEVNVKQISQL 237  
C.floridanus (EFN74421.1) 169 LQATNI DMDLTFDKIDLDFKNLGFLATVFOGVNSIGSFLFDSIKFPILKEVNTNMRGEVNVKHISTL 235  
A.aegypti (XP\_001654113.1) 238 VRTQDI SLDIADFDDMSDFQNLGFMGSI FQSVVNSASNLVFDITKFPMLSEAYTKIRAEIDTRVENM 304  
A.aegypti (XP\_001653919.1) 174 LRTQDI ELDLDFGFMAMDFQNLGFWGRVFOGLANAAPNMVFDVYKPYMLSEAYTKIRAEIDTRVENM 240  
C.quinquefasciatus (XP\_001863022.1) 176 VRTQDI SLDIADFDDMSDFQNLGFMGSI FQSVVNSASNLVFDITKFPMLSEAYTKIRAEIDTRVENM 242  
A.gambiae (XP\_312626.4) 167 LRTQDI ELDLADFDDMSDFQNLGFMGSI FQSVVNSASNLVYDITKFPMLSEAYTKIRAEIDTRVENM 233  
A.darlingi (EFR25164.1) 190 LHTDNI ELDLDFEEMAMDFQNLGFMGSI FQSVVNSASNLVYDITKFPMLSEAYTKIRAEIDTRVENM 256  
D.virilis (XP\_002052633.1) 164 LTTTEQIKMDITFGEMAMDFQNLGFLGSLVQSMINSAPNVVFDAMKPFMLQEQADKQLRTEINAFIEKN 230  
D.mojavensis (XP\_002002021.1) 163 LTTTEHIDMDITFGEMAMDFQNLGFLGSLVQFQIINSAPNLVFDAMKPFMLQEQADKQMRGEINTRIEKF 229  
D.grimshawi (XP\_001989184.1) 161 LTTTDRIKMDISFGEMAMDFQNLGFLGSLVQGLINSAPNLVFDAMKPFMLQEQADKQLRTEINAFIEKT 227  
D.willistoni (XP\_002064455.1) 173 LTTTDSIKMDITFGEMAMDFQNLGFLGSLVQFQIINSAPNLVFDAMKPFMLQEQADKQLRGEINENIEKL 239  
D.simulans (XP\_002078032.1) 169 LATDRIKIDITFSDMTDFQNLGLVGSVFOGVNSVGNAPNLVFDAMKPFMLQEQADKQLRGEINVMIQKT 235  
D.sechellia (XP\_002045314.1) 169 LATDRIKIDITFSDMTDFQNLGLVGSVFOGVNSVGNAPNLVFDAMKPFMLQEQADKQLRGEINVMIQKT 235  
D.melanogaster (NP\_608781.2) 169 LATDRIKIDITFSDMTDFQNLGLVGSVFOGVNSVGNAPNLVFDAMKPFMLQEQADKQLRGEINVMIQKT 235  
D.melanogaster (AAL68365.1) 169 LATDRIKIDITFSDMTDFQNLGLVGSVFOGVNSVGNAPNLVFDAMKPFMLQEQADKQLRGEINVMIQKT 235  
D.melanogaster (AAL48116.1) 169 LATDRIKIDITFSDMTDFQNLGLVGSVFOGVNSVGNAPNLVFDAMKPFMLQEQADKQLRGEINVMIQKT 235  
D.erecta (XP\_001968564.1) 169 LATDRIKIDITFSDMTDFQNLGLVGSVFOGVNSVGNAPNLVFDAMKPFMLQEQADKQLRGEINVMIQKT 235  
D.yakuba (XP\_002087828.1) 169 LATDRIKIDITFSDMTDFQNLGLVGSVFOGVNSVGNAPNLVFDAMKPFMLQEQADKQLRGEINVMIQKT 235  
D.ananassae (XP\_001965094.1) 167 LATDRIKIDITFSDMTDFQNLGLVGSVFOGVNSVGNAPNLVFDAMKPFMLQEQADKQLRSEMDKFIQOS 233  
D.pseudoobscura (XP\_001356411.1) 168 LTTTDRIKIDITFRDMAMDFQNLGFMGSI FQGVNSAPNLVFDAMKPFMLQEQADKQLRSEIDTMLKTS 234  
A.pisum (XP\_001945904.1) 268 LQATDTEMDMQFKDCELDKFKLGFASMMQGVISMSGVLEFEGIKFFIINEVNTNLRADVNAQVKAI 334  
A.pisum (XP\_001948728.2) 157 LETNINLNMNMYDSLHMDTKLIN - - IFFYDSFVNSFTHFVQTIKPIIMKLINVMIKEELNQMCKHF 221  
P.humanus corporis (XP\_002425163.1) 143 LEAQNI NMDITFQNIAMNFQNLGFMGSI FQGIINSVGTFFIFDSIKPILISQVNDNVRGDVNVKHMEL 209  
D.pulex (BFX77001.1) 174 MQATNI TFDVGFKDIITMKEFENLGFGLGSLFQGIINSVGTFFIFDSIKPILILQINDQVQTNVNSQMKKL 240

B.mori LTP-III 222 AGD--LQFPNSISPL-DMVIA D VRKKVHQMDMPYKIKDYNTSVSV--FVVTLADTWVMGIISSFORV 283  
D.plexippus (EHJ73751.1) 225 AGD--VQFPNSISPL-DKVIADLRKKVRQINMDPYQINDYNSTVSI--FTVSLTHTWITGIISSFORV 286  
D.plexippus (EHJ73750.1) 235 VGD--IEFPNITITPL-DMVIVDARKNIRDKVMDPLRIDDYNTSAGW--VNIYLNKNTWLYGLSTINRV 296  
D.ponderosae (ABE62911.1) 214 P----QRFPNSIAPC-DQVVAQARSMVRARGYDFYRVKALNTSISGL--ADVQLTHTWLYGAASFHRT 273  
T.castaneum (XP\_972731.1) 223 P----QKFPNSISPF-DQLITLDIRHKIRKAQDFYKVNVDYNTSVGV--FDIYMRHTWLYGLSSIHRV 282  
A.florea (XP\_003697952.1) 228 P----QYFPNSISPF-DMAI AELRKYISQMGYDFFKVNDYSQTVGI--FTVTSTHTWITGLASFYRM 287  
A.mellifera (XP\_395658.4) 228 P----QYFPNSISPF-DMAI AELRKYISQMGYDFFEVNDYSQTVGI--FTVTSTHTWITGLANIRYI 287  
B.impatiens (XP\_003492016.1) 240 P----QYFPNSISPF-DMLITLIRROISEKGYDFFKVKDYSQTVGI--FTVTMSTHTWITGLGSVYRM 299  
M.rotundata (XP\_003708008.1) 228 P----QYFPNSISPF-DMAVAEARKVQSLGYDFFKVQDYSQSVGM--FTVTSTHTWITGLASFYRM 287  
N.vitripennis (XP\_001606118.1) 232 P----NYFPNSISPF-DMAVAEARKVQSDMGYDFFKVKDYSQSMGM--FTVTSSHTWITGLASFYRM 291  
S.invicta (EFZ14465.1) 258 P----QYFPNSISPF-DMAI AEARKEYSEMGYDFYKLDYTSQVGI--FTVTSSHTWITGLASFYRM 317  
A.echinator (EGI63413.1) 243 P----QYFPNSISPF-DMAI AEARKEYSQMGYDFYKLDYTSQVGI--FTMTSSHTWITGLASFYRM 302  
H.saltator (EFN76863.1) 238 P----QYFPNSISPF-DMAVAEARKVRLMGYDFYRVQDYTSAGV--FTVTSSHTWITGLASFYRM 297  
C.floridanus (EFN74421.1) 236 P----QYFPNSISPF-DMAVAEARKVSEMGYDFYKLDYTSQVGI--FTVTLSSHTWITGLASFYRM 295  
A.aegypti (XP\_001654113.1) 305 TTEYNIVFPNSISPL-DMAI GEARTLVRNKKFDPYLI PDYNTTLAGI--FGMHTSHTWIRGVSSFYRY 368  
A.aegypti (XP\_001653919.1) 241 VDKRAIVLANSVPL-DLMI SEARFLMRTKGFDFYHLPDYRNSLSI--FNLFLSGTRLRGLSNFYRS 304  
C.quinquefasciatus (XP\_001863022.1) 243 TTEHRILFPNSISPL-DMAI GEARTLVRNKKFDPYLI PDYNTTLAGI--FGMQTTHTWIRGVSSFYRY 306  
A.gambiae (XP\_312626.4) 234 TVENQFTLNSIAPL-DMAI GEMRRIVRNKKLDFQVDPDYNNTAGI--FGMQTSSHTWISGGSSFYRY 297  
A.darlingi (EFR25164.1) 257 TLEHDFILNSITPL-DMAI GEMRAVVRNKKGLDFLVPDYNNTAGI--FGMRTMHTWIKGSSFYRY 320  
D.virilis (XP\_002052633.1) 231 MGDR--RMPNSITPL-DSAI AEGRKLVRQKGLDFYHVADMNRTMGV--FSVQLSNTWINGISSFYRV 292  
D.mojavensis (XP\_002002021.1) 230 MGDR--RMPNSITPL-DSAI AGLRKMVRKGYDFYRLEDKNRTMGV--FSVQLTNTWITGCSFYRV 291  
D.grimshawi (XP\_001989184.1) 228 LGDR--RMPNSITPL-DSVIA EGRKLVRQNGYDFYHLPDMNRTMGV--FSVQLANTWISGVSSFYRV 289  
D.willistoni (XP\_002064455.1) 240 MGDR--RLNSITPL-DSAI AEARKKVRAMGYDFYHVDPNRTMGV--FSVQLSHTWINGISSFYRV 301  
D.simulans (XP\_002078032.1) 236 LGDR--RLNSITPL-DSAI AMARKMVRQGGYDFYHLPDVRNRTMGV--FSVQLAHTWINGISSFYRV 297  
D.sechellia (XP\_002045314.1) 236 LGDR--RLNSITPL-DSAI AARKMVRQGGYDFYHLPDVRNRTMGV--FSVQLAHTWINGISSFYRV 297  
D.melanogaster (NP\_608781.2) 236 LGDR--RLNSITPL-DSAI AMARKMVRQKGFDFYHLPDVRNRTMGV--FSVQLAHTWINGISSFYRV 297  
D.melanogaster (AAL68365.1) 236 LGDR--RLNSITPL-DSAI AMARKMVRQKGFDFYHLPDVRNRTMGV--FSVQLAHTWINGISSFYRV 297  
D.melanogaster (AAL48116.1) 236 LGDR--RLNSITPL-DSAI AMARKMVRQKGFDFYHLPDVRNRTMGV--FSVQLAHTWINGISSFYRV 297  
D.erecta (XP\_001968564.1) 236 LGDR--RLNSITPL-DSAI AMARKMVRKGYDFYHLPDVRNRTMGV--FSVQLAHTWINGISSFYRV 297  
D.yakuba (XP\_002087828.1) 236 LGDR--RLNSITPL-DSAI AMARKMVRKGYDFYHLPDVRNRTMGV--FSVQLANTWINGISSFYRV 297  
D.ananassae (XP\_001965094.1) 234 MGDR--KLNSITPL-DSAI AARKMVRKGYDFYKLDQDMNRTMGV--FSVQLSNTWISGLSSFYRV 295  
D.pseudoobscura (XP\_001356411.1) 235 MGDR--RLNSITPL-DSAI AEGRKKVRQMGYDFYHLPDMNRTMGV--FSVQLSHTWIHGIISSFYRV 296  
A.pisum (XP\_001945904.1) 335 T----SKLPKMTVPVPDLAVAEGRKRYVORMGYDFYHVADRHIDEGP--LNFTITELTVSGLSSFHRT 395  
A.pisum (XP\_001948728.2) 222 K----RFNITIPV-DLLI ABSRQIKSMGFDFYRVDLVNAVNFNIFSLDVNEIWIISGLSSIYRL 282  
P.humanus corporis (XP\_002425163.1) 210 P----QRFPNSISPL-DMFISEMRKFAIKKFDYKIDYNNNSAGI--FTVELTNTWITGLASFYRV 269  
D.pulex (BFX77001.1) 241 N----HILPDSVAPL-DMAMA GRABEQENGMDFEIPYETSILITG--VVVKIFNGTMHGLSTIHRV 301

**B.mori LTP-III**  
D.plexippus (EHJ73751.1) 284 GNISLIMENNNTAVADFEIGTQKLEGGTQKWEISAIIS-GLLSRAGTASFSVEYISARIIILGQPLDTRKK 349  
D.plexippus (EHJ73750.1) 287 GNITLKLKLENNNTVADFEIGTQRLGEGTTQWDVSAIS-GLLSRAGTASFSVEYISGRMILAQPLDTRKK 352  
D.plexippus (EHJ73750.1) 297 GNVSLLKVENKTVVADFSIGTEMLGSDTWEISGCR-GLISSFGTSSFSVKYIRGHFILLVQPLDTRKR 362  
D.ponderosae (AEE62911.1) 274 RALVVAMRNNTLHALIEVGTQRLGLGTHWEVALVS-GVLSRAGTASFSVEYLRVQVNASOSMDTROR 339  
T.castaneum (XP\_972731.1) 283 GDIITFEIKKNSVYAVLEVGTQRMEGTSHWEVSLIA-GFMSKAGTVSFSVEYLRVQVAISQTMDRNP 348  
A.florea (XP\_003697952.1) 288 GNVITLGIKNGTVYATVDAGTQBLEGKTHWEVSVIG-GFLSRAGTVSFTTQYFRAQVNLSSQPLDTRKR 353  
A.mellifera (XP\_395658.4) 288 GNVITLGIENGTVYATIDAGTQBLEGKTHWEVSVIG-GFLSRAGTVSFTTQYFRAQVNLSSQPLDTRKR 353  
B.impatiens (XP\_003492016.1) 300 GNVITLGIENKTVYATIDAGTQBLEGKTHWEVSVIG-GVLSRAGTIVFTTQYFRAQVNLSSQPLDTRQK 365  
M.rotundata (XP\_003708008.1) 288 GNITLSMENGTVYALIDVGTQBLEGRTHWEVSVIG-GFLSRAGTVSFTTQYFRVQIKFGQPLDTRKK 353  
N.vitripennis (XP\_001606118.1) 292 GNITLSMENGTVYAVMDIGTQBLEGRTHWDVSVIG-GVLSRAGTVSFTTVEYFRVQNLSSQPLDTRKR 357  
S.invicta (EFZ14465.1) 318 GNITVSMENGTVYALVDIGTQBLEGKTHWEVSVIG-GFLSRAGTVSFTTQYFRVQIKLGGQPLDTRKR 383  
A.echinator (EGI63413.1) 303 GNITITMENGTVIYALLDVGTEBLEGKTHWEVSVIG-GFLSRAGTVSFTTQYFRVQIKLGGQPLDTRKR 368  
H.saltator (EFN76863.1) 298 GNITITMEKGNVYLLLDIGTQBLETGTKTHWEVSVIG-GFLSRAGTVSFTTQYFRVQIKLGGQPLDTRKR 363  
C.floridanus (EFN74421.1) 296 GNITITLENGTVYALLDVGTEKLGKTHWEVSVIG-GFLSRAGTVSFTTQYFRVQIKLSSQPLDTRKR 361  
A.aegypti (XP\_001654113.1) 369 GAIIGILMONNTVAVTALMQVGTQIRIMGSTQWEVSVGR-GMVSRAGQAQFTVEHIVKVSFEVQPLDTRRK 434  
A.aegypti (XP\_001653919.1) 305 GEMEITAVONKSMACITQVGTQIRIEGSTRWQLSVIR-DVLSRSGAIFFSVQVYRRLSIVKVNQPLDTRKK 370  
C.quinquefasciatus (XP\_001863022.1) 307 GDIIGILMONNTVSLTMQVGTQIRIMGSTQWEVSVGR-GMVTRAGQAQFTVEHIVKVSFEVQPLDTRRK 372  
A.gambiae (XP\_312626.4) 321 GDISITMONNTATVGMHVATORIVGSTQWTVSIGR-GMLSHPRGAQFTVEHIVKVSFEVQPLDTRRK 363  
A.darlingi (EFR25164.1) 328 GAIISVTMONNTATVGLHVATORLGTSTHWEAGP-----SLRSSTSVQSSRS-----DSRLICDKK 375  
D.virilis (XP\_002052633.1) 293 GNITAAAMONNTVSLRLQVGTQOITGAGQWELGFG---LVTRVGHVQFTVQYIRATVEISQPLDTRQR 356  
D.mojavensis (XP\_002002021.1) 292 GNVITAAAMHNTVISMRLQGTQOITGAGQWELGFG---LMTRVGHVQFTVQHIRATVEISQPLDTRKR 355  
D.grimshawi (XP\_001989184.1) 290 GNITAGMONNTISLRLQVGTQOITGAGQWELGFG---LVTRVGHVQFTVQHIRATVEISQPLDTRKR 353  
D.willistoni (XP\_002064455.1) 302 GNMISAGIENNTISLRLQVGTQOQVTTGAGQWELGFG---MMTRVGHVQFTVQHIRATVIGISQPLDTRKR 365  
D.simulans (XP\_002078032.1) 298 GNITAGMANKTVSVVLQIGTQOQVTTGAGQWELGFG---MMTRVGHVQFTVQHIRATVIGISQPLDTRKR 361  
D.sechellia (XP\_002045314.1) 298 GNITAGMANKTVSVVLQIGTQOQVTTGAGQWELGFG---MMTRVGHVQFTVQHIRATVIGISQPLDTRKR 361  
D.melanogaster (NP\_608781.2) 298 GNITAGMANKTVSVVLQIGTQOQVTTGAGQWELGFG---MMTRVGHVQFTVQHIRATVIGISQPLDTRKR 361  
D.melanogaster (AAL68365.1) 298 GNITAGMANKTVSVVLQIGTQOQVTTGAGQWELGFG---MMTRVGHVQFTVQHIRATVIGISQPLDTRKR 361  
D.melanogaster (AAL48116.1) 298 GNITAGMANKTVSVVLQIGTQOQVTTGAGQWELGFG---MMTRVGHVQFTVQHIRATVIGISQPLDTRKR 361  
D.erecta (XP\_001968564.1) 298 GNITAGMANKTVSAVLQIGTQOQVTTGAGQWELGFG---MMTRVGHVQFTVQHIRATVIGISQPLDTRQR 361  
D.yakuba (XP\_002087828.1) 298 GNITAGMANKTVSVVLQIGTQOQVTTGAGQWELGFG---MMTRVGHVQFTVQHIRATVIGISQPLDTRKR 361  
D.ananassae (XP\_001965094.1) 296 GNITVGMANKTVSLNLHLGTQOQVTTGAGQWELGFG---MMTRVGHVHFTVQHIRALVGVSSQPLDTRKR 359  
D.pseudoobscura (XP\_001356411.1) 297 GNITALMANKTVSLVQVGTQOQVTTGAGQWELGFG---MMTRVGHVQFTVQHIRATVIGVSSQPLDTRQR 360  
A.pisum (XP\_001945904.1) 396 GDITGLQIRGVPVQLQMSVHVITGAVNGSLRWVSYRLGLSKTFRRTGVSNFTVDHIVQVRAVNVQTLDLTRNK 462  
A.pisum (XP\_001948728.2) 283 GDITHTISIQNTIISVHIHTQELKKGHCQWIKGAGG--VLKTTGVLVFSFIDYIQLBANVTQPMDFRLA 347  
P.humanus corporis (XP\_002425163.1) 270 GNVITLTKKEKVLVYAGLHVGTINQLFGSCQWEIGVAG--LMSRAGTVSFTTEYLQVNVTVAPLDRKK 334  
D.pulex (BFX77001.1) 302 GDVIFNYENGLVVGAAQATQRLKGHFNWQLDF---KVPAPRGKISLQIDHLDVKIGLSQVFNVOKK 365

**B.mori LTP-III**  
D.plexippus (EHJ73751.1) 350 PQRSLDLEVGNIQVRCNAGTLDYVVEFVFNILPNLLRYQIMDAIEGPKLKRRLQVSELDKLDVEEMI 416  
D.plexippus (EHJ73750.1) 353 PEFRLDLDVGNIQVRFDDGAGTLDYVVEFAVNVLPNLLRYQIVDAIEGPIIEKIQQELNKNINVEEMI 419  
D.plexippus (EHJ73750.1) 363 MMLKTLLELDVGNVQVRFDDGAGTLDYVVEFSTNLPNLLRYQIVDAIQNPKKWKLOSELDDLDIEEAI 429  
D.ponderosae (AEE62911.1) 340 PRLDDIQLQLGNVQVRFDDGAGTLDYVVELEAVNVLPNLLRYQIMDAIERPLRKKIQABLDKVDVERLI 406  
T.castaneum (XP\_972731.1) 349 PQLEDIQLLELGNIQVRFDDGAGTLDYVVEFAVNVLPNLLRYQIMDAIEAPVKORIQEELNKNVIERMI 415  
A.florea (XP\_003697952.1) 354 PSMEBLELELGNIQVRIHGAGTLDYVVEASINILPNLLRYQIMDAIEGPKLKRRLQVFLNKNVDEKQI 420  
A.mellifera (XP\_395658.4) 354 PSMEBLELELGNIQVRIHGAGTLDYVVEASINILPNLLRYQIMDAIEGPKLKRRLQVFLNKNVDEKQI 420  
B.impatiens (XP\_003492016.1) 366 PNMEGLDLELGNIQVRIHGAGTLDYVVEASINILPNLLRYQIMDAIEGPKLKRRLQVFLNKNVDEKQI 432  
M.rotundata (XP\_003708008.1) 354 PRIEBLELELGNIQVRIHGAGTLDYVVEASINILPNLLRYQIMDAIEGPKLKRRLQVFLNKNVDEKQI 420  
N.vitripennis (XP\_001606118.1) 358 ATLEBLEDFELGNIQVRIHGAGTLDYVVEAGVNVLPNLLRYQIMDAIEGPIRRRIQDBLDKVNVDEKLI 424  
S.invicta (EFZ14465.1) 384 ASLEBLELELGNIQVRIHGAGTLDYVVEASVNVLPNLLRYQIMDAIEGPKLKRRLQVFLNKNVDEKLI 450  
A.echinator (EGI63413.1) 369 ALLEBLELELGNIQVRFHGARTLDYVVEASVNVLPNLLRYQIMDAIEGPKLKRRLQVFLNKNVDEKLI 435  
H.saltator (EFN76863.1) 364 ASLEBLELELGNIQVRIHGAGTLDYVVEASVNVLPNLLRYQIMDAIEGPKLKRRLQVFLNKNVDEKLI 430  
C.floridanus (EFN74421.1) 362 ATLEBLELELGNIQVRIHGAGTLDYVVEAGVNVLPNLLRYQIMDAIEGPKLKRRLQVFLNKNVDEKLI 428  
A.aegypti (XP\_001654113.1) 435 PKLNDIQLLELGNIQVRCDDGAGTLDYVVEAVNVLPNLLRYQIMDAIENPLKTRVQEKLDCCINVEQMI 501  
A.aegypti (XP\_001653919.1) 371 PSLMDFQLELGNIQVIFSSGAGSMDYVVEAGVNVLPNLLRYQIMDAIERPLRRIREKLECNVEQFV 437  
C.quinquefasciatus (XP\_001863022.1) 373 PKLNDIQLLELGNIQVRCDDGAGTLDYVVEAVNVLPNLLRYQIMDAIENPLKTRVQEKLDCCINVEQMV 439  
A.gambiae (XP\_312626.4) 364 LKLRDIQLLELGNIQVRSDDGAGTLDYVVEAVNVLPNLLRYQIMDAIENPLMRRIQEKLDCCINTEALV 430  
A.darlingi (EFR25164.1) 376 LQLKDIQLLELGNIQVRFDDGAGTLDYVVEAVNVLPNLLRYQIMDAIENPLMRRIQEKLDCCINTEAMV 442  
D.virilis (XP\_002052633.1) 357 PQINDLQDFMGNIQVRCDDGAGTLDYVVEFAVNVLPNLLRYQIMDAIENPKIKRVQEKFNITDVEQVI 423  
D.mojavensis (XP\_002002021.1) 356 PQINDLQDFMGNIQVRCDDGAGTLDYVVEFVFNVLPNLLRYQIMDAIENPKIKRVQEKFNITDVEQVL 422  
D.grimshawi (XP\_001989184.1) 354 PQINDLQDFMGNIQVRCDDGAGTLDYVVEFAVNVLPNLLRYQIMDAIENPKIKRVQEKFNITDVEQAI 420  
D.willistoni (XP\_002064455.1) 366 PQINDLQDFMGNIQVRCDDGAGTLDYVVEFVFNVLPNLLRYQIMDAIENPKIKRVQEKFNITDVEQAI 432  
D.simulans (XP\_002078032.1) 362 AQITDLODFMGNIQVRCDDGAGTLDYVVEFAVNVLPNLLRYQIMDAIENPKIKRVQEKFNITDVEQVI 428  
D.sechellia (XP\_002045314.1) 362 AQITDLODFMGNIQVRCDDGAGTLDYVVEFAVNVLPNLLRYQIMDAIENPKIKRVQEKFNITDVEQVI 428  
D.melanogaster (NP\_608781.2) 362 AQITDLODFMGNIQVRCDDGAGTLDYVVEFAVNVLPNLLRYQIMDAIENPKIKRVQEKFNITDVEQVI 428  
D.melanogaster (AAL68365.1) 362 AQITDLODFMGNIQVRCDDGAGTLDYVVEFAVNVLPNLLRYQIMDAIENPKIKRVQEKFNITDVEQVI 428  
D.melanogaster (AAL48116.1) 362 AQITDLODFMGNIQVRCDDGAGTLDYVVEFAVNVLPNLLRYQIMDAIENPKIKRVQEKFNITDVEQVI 428  
D.erecta (XP\_001968564.1) 362 AQITDLODFMGNIQVRCDDGAGTLDYVVEFAVNVLPNLLRYQIMDAIENPKIKRVQEKFNITDVEQVI 428  
D.yakuba (XP\_002087828.1) 362 AQITDLODFMGNIQVRCDDGAGTLDYVVEFAVNVLPNLLRYQIMDAIENPKIKRVQEKFNITDVEQVI 428  
D.ananassae (XP\_001965094.1) 360 PQITDLODFMGNIQVRCDDGAGTLDYVVEFVFNVLPNLLRYQIMDAIENPKIKRVQEKFNITDVEQAI 426  
D.pseudoobscura (XP\_001356411.1) 361 PQITDLODFMGNIQVRCDDGAGTLDYVVEFAVNVLPNLLRYQIMDAIENPKIKRVQEKFNITDVEQAI 427  
A.pisum (XP\_001945904.1) 463 PVLDKLDIEVGVKIEVQMRKEPLDYVVEIAVNSLPSLLRHITVDAIEEPIKAKAQITLDDVQVEKMV 529  
A.pisum (XP\_001948728.2) 348 PFLNEFGLSVGNIQVRFDDGAGTLDYVVEALVNVLPNLLRYQIMDAIENPKIKRVQEKFNITDVEQAI 414  
P.humanus corporis (XP\_002425163.1) 335 PKIEDFNKLGNIQVRFVNGAGTLDYVVEFLVNVLPNLLRYQIMDAIENPKIKRVQEKFNITDVEQAI 401  
D.pulex (BFX77001.1) 366 PRLVLEQVNLGNIQVRCSTGTSVDYVVEFAVNVLPNLLRYQIMDAIENPKIKRVQEKFNITDVEQAI 432

|                                            |     |                                                          |     |
|--------------------------------------------|-----|----------------------------------------------------------|-----|
| <b>B.mori LTP-III</b>                      | 417 | HEKLP EIDEMAESG-----FKLSS IIGKSEDEKDIRYDDDDFFN---        | 455 |
| <i>D.plexippus</i> (EHJ73751.1)            | 420 | KQELPKVDEM QETG-----FKLSALQIQNEDEE--SYGDDDDFFNF--        | 457 |
| <i>D.plexippus</i> (EHJ73750.1)            | 430 | KNELPRIDKIQEEG-----FQLAMLR FINKTGD--NYDEDEFFNF--         | 467 |
| <i>D.ponderosae</i> (AEE62911.1)           | 407 | QENAPKLDDPDG-----LTELTNLL-----                           | 426 |
| <i>T.castaneum</i> (XP_972731.1)           | 416 | KENVDKIDNPES-----LKLL-----                               | 431 |
| <i>A.florea</i> (XP_003697952.1)           | 421 | YEYIPSIIEEKAR---QGMIPL EE-TNLE-LISFQDQDEQ-PFSESEENRGPS   | 466 |
| <i>A.mellifera</i> (XP_395658.4)           | 421 | YEYIPSIIEEKAR---QGMIPL EE-ANLE-LISFQDQDEQ-PFSESEENRGPS   | 466 |
| <i>B.impatiens</i> (XP_003492016.1)        | 433 | YEHIPHIIEHATRH-IHGLVP EE-TILEGLMP EQDQDEQ-PFSESEENRGPS   | 482 |
| <i>M.rotundata</i> (XP_003708008.1)        | 421 | YEKIPNIEEQAR-Y-IQGLIP AE-TILEELIP EQDQDEQ-PFSESEEDRGPS   | 469 |
| <i>N.vitripennis</i> (XP_001606118.1)      | 425 | HEKIPDIIEBRAKMLQGPPLEEBLEDDIVLEEVTPPEPDNEEPFSESEEEERGQS  | 477 |
| <i>S.invicta</i> (EFZ14465.1)              | 451 | DEKIPVIEEQARW--LHDLVP AE-TNLEEPTTHN-QDDLGP FSESEEEERGPS  | 499 |
| <i>A.echinatior</i> (EGI63413.1)           | 436 | DEKIPMIEEQARW--MQGLTP SE-TILEEPLP P NSQDDQTPFSESEEEERGPS | 485 |
| <i>H.saltator</i> (EFN76863.1)             | 431 | DDKIPPEIEEQARW--MHGFKP AE-TILETPTP SPDEDSQVPFSESEENRGLS  | 480 |
| <i>C.floridanus</i> (EFN74421.1)           | 429 | DEKIPMIEEQVK----GLIPVEE-TILEESLLS-NQDDQIPFSESEENRGPS     | 474 |
| <i>A.aegypti</i> (XP_001654113.1)          | 502 | KKHVVVEYEKRGF-----DMEV-DFKLC-----                        | 522 |
| <i>A.aegypti</i> (XP_001653919.1)          | 438 | KRHVADFERRGT-----NMVV-DWRLCERKLP EK-----                 | 465 |
| <i>C.quinquefasciatus</i> (XP_001863022.1) | 440 | KKHVVVEYEKRGF-----DMEL-DLKIC-----                        | 460 |
| <i>A.gambiae</i> (XP_312626.4)             | 431 | RKYALEYKHHGI-----DIDLKDFELCEQQVPRGE-----                 | 460 |
| <i>A.darlingi</i> (EFR25164.1)             | 443 | RKYATEFEEHGI-----DLDLQDFELCHS-----                       | 466 |
| <i>D.virilis</i> (XP_002052633.1)          | 424 | KQQIEKNDHEGG-----NFAIDMNLFKMF-----                       | 447 |
| <i>D.mojavensis</i> (XP_002002021.1)       | 423 | KVALEKYKKDGL-----NFIYBYKLDNLPFN-----                     | 448 |
| <i>D.grimshawi</i> (XP_001989184.1)        | 421 | KQMAHKYDEGGS-----NFKFDLTQFKEYL-----                      | 445 |
| <i>D.willistoni</i> (XP_002064455.1)       | 433 | KQLAQKYEAEGS-----NFSDFDKI-----                           | 452 |
| <i>D.simulans</i> (XP_002078032.1)         | 429 | KTMAQN-----DFNFDPKLLGL-----                              | 445 |
| <i>D.sechellia</i> (XP_002045314.1)        | 429 | KTMAKN-----DFNFDPKLLGL-----                              | 445 |
| <i>D.melanogaster</i> (NP_608781.2)        | 429 | KTMAQN-----NFNFDPKLLGL-----                              | 445 |
| <i>D.melanogaster</i> (AAL68365.1)         | 429 | KTMAQN-----NFNFDPKLLGL-----                              | 445 |
| <i>D.melanogaster</i> (AAL48116.1)         | 429 | KTMAQN-----NFNFDPKLLGL-----                              | 445 |
| <i>D.erecta</i> (XP_001968564.1)           | 429 | KTMAQN-----DFNFDPTLLGV-----                              | 445 |
| <i>D.yakuba</i> (XP_002087828.1)           | 429 | KTMAEN-----NFNFDPKLLGI-----                              | 445 |
| <i>D.ananassae</i> (XP_001965094.1)        | 427 | KTMAQNYKADGK-----NFDDFKTLGI-----                         | 449 |
| <i>D.pseudoobscura</i> (XP_001356411.1)    | 428 | KQLAHKYETEGS-----NFTDFDKI-----                           | 447 |
| <i>A.pisum</i> (XP_001945904.1)            | 530 | EDRLPELDRMVG D-----                                      | 542 |
| <i>A.pisum</i> (XP_001948728.2)            | 415 | EQRIPPIIDKMM EHN-----ITDIFKENEILHEDINIVSKEDF-----        | 452 |
| <i>P.humanus corporis</i> (XP_002425163.1) | 402 | DEKLP TFFYELLA-----LNDTVNPEVNDIEF-----                   | 427 |
| <i>D.pulex</i> (EFX77001.1)                | 433 | EEQLPKLSELKNDL-----                                      | 446 |
